# Supplementary material for: Variation of FMRP Expression in Peripheral Blood Mononuclear Cells from Individuals with Fragile X Syndrome
Source: Genes (Basel). 2024 Mar 13;15(3):356. doi: 10.3390/genes15030356 (PMC10969917; doi:10.3390/genes15030356)
Supplement: Supplementary file 1 [file genes-15-00356-s001.zip]

Archive with 8 entries (8 files):
- Figure S1.tiff
- Figure S2.tiff
- Figure S3.tiff
- Figure S4.tiff
- Figure S5.tiff
- Figure S6.tiff
- Randol_Supplementary_Information.pdf
- Table S1. Molecular dataset.xlsx
