# Supplementary material for: Variation of FMRP Expression in Peripheral Blood Mononuclear Cells from Individuals with Fragile X Syndrome
Source: Genes (Basel). 2024 Mar 13;15(3):356. doi: 10.3390/genes15030356 (PMC10969917; doi:10.3390/genes15030356)
Supplement: Supplementary file 1 [file genes-15-00356-s001.zip › Table S1. Molecular dataset.xlsx]

## Sheet: Molecular data
Sample	Bio.num	Tech.num	Age.year	Category	Fraction.methylated	mRNA	mRNA.se	mRNArel	mRNArel.se	FMRPsig	FMRP.1	FMRP.2	FMRP.3	FMRP.4	FMRP.5	FMRP.6	FMRP.7	FMRP.8	FMRPrel	FMRPrel.se	Unsorted.CGG.repeats.-all.identified.alleles	UnMeth.CONTROL.CGG1	UnMeth.from.Mosaic.CGG2	UnMeth.from.Mosaic.CGG3	UnmethSmear.Lo.End	UnmethSmear.Hi.End	Smallest.Meth.CGG1	MethCGG2	MethCGG3	MethCGG4	MethCGG5	MethCGG6	MethCGG7	MethCGG8	MethSmearLoEnd	MethSmearHiEnd	Comments
P12-03	1	1	25.3333	Meth Mosaic	0.78	0.22	0.008	0.1691	0.00614908	0	0.00640808	0.0334046	0.0212896	0.00732587	0.0255156	-0.00919368	0.0511598	0.0408355	0.0857277	0.0273367	330, 480, 560, 1130 (250-480)				250	480	330	480	560	1130
P09-29	2	2	14.25	Size-Meth Mosaic	0.45	1.44	0.07	1.10684	0.0538045	1	0.113955	0.115889	0.0706644	0.049755	0.0729348	0.127035	0.131362	0.0533401	0.356469	0.046167	640 (150)		150				640
P10-13	3	3	44.1667	Full mutation		0.00018504	0	0.000142228	0	0	0.00660868	0.00696612	0.0119601	0.0239005	-0.0103716	0.00172734	-0.0281537	0.0169523	0.0143521	0.0225281	710, 840						710	840
P10-33	4	4	26.9167	Full mutation		0.0378	0.0066498	0.0290544	0.00511127	0	0.016525	0.0149552	0.011981	0.00373584	0.0493657	0.0480153	-0.0543598	-0.0355089	0.026536	0.0498389	340						340
P10-17	5	5	25.9167	Size-Meth Mosaic	0.4	2.05	0.06	1.5757	0.0461181	1	0.103559	0.149996	0.115311	0.131583	0.120499	0.0808012	0.141209	0.158133	0.485564	0.034999	460, 630, 780 (104)		104				460	630	780
P05-23	6	6	15.6667	Full mutation		0		0		0	0.0269992	0.00219651	0.0033576	0.0175433	5.76793e-05	-0.00056009	0.000909634	0.0118559	0.0302467	0.0138013	470						470
P06-05	7	7	13.5	Full mutation		0		0		0	0.0489856	0.0157582	0.0664425	0.00566318	-0.0018299	-0.0623606		0.107465	0.0998472	0.0801071	300, 460, 600, 730, 1000						300	460	600	730	1000
P09-37	7	8	18.8333	Full mutation		0		0		0	0.271554	0.0559578	0.0684297	0.088717	0.178726	0.136035	0.0264052	0.0371855	0.418591	0.114612	300, 460, 600, 730, 1000						300	460	600	730	1000
P09-27	8	9	5.5	Size-Meth Mosaic	0.94	0.06	0	0.0461181	0	0	0.0195406	0.0482381	0.0232689	0.0724798	0.0766302	0.0502898	-0.00318422	0.0720893	0.174299	0.0400642	950, 1080 (85)		85				950	1080
P03-13	9	10	16.5	Control		1.29	0.19	0.99154	0.146041	1	0.213565	0.198342	0.196081	0.186541	0.191838	0.195206		0.190517	0.760585	0.0127227	30	30
P10-31	10	11	16.4167	Control		1.4675	0.0199	1.12797	0.0152958	1	0.391915	0.347875	0.323658	0.330672	0.313081	0.36945	0.300736	0.376252	1.33561	0.0446582	42	42
P13-02	11	12	13.5	Control		1.1138	0.0421	0.856106	0.0323596	1	0.272448	0.213937	0.257579	0.28192	0.250466	0.211719	0.257827	0.217298	0.952219	0.0377765	41	41
P13-03	12	13	18.3333	Control		0.9173	0.0289	0.705069	0.0222136	1	0.305246	0.32054	0.304019	0.293491	0.288443	0.216563	0.269016	0.245286	1.08774	0.0476934	23	23
P08-27	13	14	18.8333	Control		1.0185	0.0375	0.782855	0.0288238	1		0.266775	0.236273	0.274815	0.197061	0.240784		0.2285	0.933989	0.0443357	36	36
P03-09	14	15	36.5	Control		1.22	0.043	0.937735	0.0330513	1	0.294723	0.248773	0.277366	0.295848	0.299859	0.225309	0.215617	0.276192	1.03491	0.0451516	29	29
P06-29	15	16	80.5833	Control		1.42	0.05	1.09146	0.0384318	1	0.360678	0.380292	0.383831	0.352162	0.39321	0.439061	0.393802	0.413272	1.51152	0.0380877	30	30
P07-22	15	16	80.5833	Control		1.42	0.05	1.09146	0.0384318	1	0.290935	0.31522	0.299395	0.281031	0.266826	0.331015	0.306702	0.242986	1.13213	0.0384172	30	30
P09-31	16	17	11.0833	Control		1.1	0.11	0.845499	0.0845499	1	0.19502	0.231426	0.230886	0.21448	0.284201	0.235129	0.269245	0.235855	0.919744	0.0388389	20	20
P08-07	17	18	13.25	Full mutation		0.04	0.0010477	0.0307454	0.000805299	0	0.00691843	0.009993	0.00426976	0.014218	0.0190338	0.00289523	-0.00367314	0.00986229	0.0308082	0.00963431	420, 510, 720						420	510	720
P02-30	18	19	12.0833	Size-Meth Mosaic	0.05	4.87	0.13	3.74326	0.0999226	1	0.0534589	0.0399994	0.0799557	0.0846706	0.0785971	0.0229815	0.0885124	0.0570937	0.245074	0.0324129	180 (80-550)				80	550	180
P03-22	19	20	30.75	Full mutation		0.0004	0.0002	0.000307454	0.000153727	0	-0.00597392	-0.00899797	0.0200546	-0.014851	-0.0137311	-0.00139985	0.00940408	-0.0163204	-0.0154316	0.0176463	590						590
P07-11	19	20	30.75	Full mutation		0.0004	0.0002	0.000307454	0.000153727	0	0.00710033	-0.019297	0.0009437	0.040493	-0.0581999	-0.0386897	-0.00261792	-0.0126066	-0.0401968	0.0410085	590						590
P10-19	19	21	30.8333	Full mutation		0.0002	9e-05	0.000153727	6.91772e-05	0	0.00656612	-0.0217734	-0.00748751	0.00443174	0.00824117	0.0183813	-0.0222999	0.0324025	0.0089547	0.0259433	590						590
P06-36	20	22	15.1667	Full mutation		0.04	0.02	0.0307454	0.0153727	0	0.0496004	0.0112057	0.000336622	0.018181		0.0128303		-0.00602953	0.0556979	0.0307267	790, 1000, 1100						790	1000	1100
P12-04	21	23	57.25	Control		1.2	0.03	0.922363	0.0230591	1	0.205117	0.199737	0.158195	0.194438	0.282567	0.179659	0.140042	0.174991	0.744406	0.0584901	29	29
P06-28	22	24	11.6667	Full mutation		0		0		0	0.0420919	-0.0046418	0.0021132	0.00343705	0.0102871	0.0433601	0.0412636	0.0463595	0.0893778	0.0302478	490, 940, 1400						490	940	1400
P09-24	22	25	12	Full mutation		0		0		0	0.00196181	0.0790809	0.0298417	0.024978	-0.0806577	0.0300061	-0.00695894	0.0462431	0.0603845	0.0644048	490, 940, 1400						490	940	1400
P08-10	23	26	32.75	Meth Mosaic		0.63	0.02	0.48424	0.0153727	0	0.0387731	0.0136888	0.0148458	0.0404885	0.117921	0.000660761	4.25208e-05	0.036872	0.127706	0.0522412	300, 660, 800, 960 (wide smear)						300	660	800	960							wide smear
P10-11	24	27	9.58333	Full mutation		0.00044413	0	0.000341374	0	0	0.0268685	0.00113937	0.00924635	-0.00470158	0.0125241	-0.0450326	0.0546164	0.0235582	0.0379389	0.0394514	710, 850						710	850
P14-11	24	27	9.58333	Full mutation		0.00044413	0	0.000341374	0	0	0.0284756	-0.00325233	-0.00089724	0.0160556	0.00936297	0.0226442	0.0279329		0.0556109	0.0191496	710, 850						710	850
P04-32	25	28	10.1667	Control		0.9677	0.061	0.743809	0.0468868	1	0.356396	0.374468	0.336446	0.323584	0.276399	0.219304	0.189534	0.226778	1.11699	0.0957029	30	30
P04-06	26	29	26.5	Full mutation		0.09	0.007	0.0691772	0.00538045	0	0.0048469		0.00728957	0.00314514	-0.00467492	-0.00916829	-0.000331021	0.0197517	0.0115627	0.0136602	450						450
P02-08	27	30	19.0833	Meth Mosaic	0.78	0.22	0.03	0.1691	0.0230591	0	0.00732085	0.0102911	0.0362713	0.0316427	0.0306609	0.0291474	-0.0278527	0.0190675	0.0662311	0.028752	200, 370, 520, 580, 960 (200-400)				200	400	200	370	520	580	960
P10-03	28	31	16.5833	Full mutation		0.12	0.01	0.0922363	0.00768636	0	0.0327064	0.00702652	-0.007077	0.0159044	0.059559	0.0227499	0.10274	0.0695633	0.147049	0.0502524	470, 560, 850, 960						470	560	850	960
P11-10	29	32	5.66667	Full mutation		0.0802904	0.0022	0.0617141	0.001691	0	0.0595698	0.0159055	0.00867008	-0.00790374	-0.032504	0.0650317	-0.0300383	0.00045942	0.0384102	0.0501213	320, 560						320	560
P09-08	30	33	18.6667	Size-Meth Mosaic	0.9	0.1191	0.001	0.0915445	0.000768636	0	0.0392722	-0.00366102	0.00688386	0.0199369	0.0728784	-0.0783191	0.00822421	-0.0248103	0.019598	0.0611877	520, 680, 890, 1340 (24, 43)		24	43			520	680	890	1340
P09-09	33	36	9.91667	Full mutation		0		0		0	0.0215855	-0.00502515	0.0672133	0.0347463	0.0435633	-0.039488	0.00519535	-0.00657297	0.0587948	0.0461069	490, 880, 1130						490	880	1130
P14-02	33	36	9.91667	Full mutation		0		0		0	0.0329639	0.0181151	0.00120057	0.0268006	0.0126109		0.0254241		0.0757401	0.018116	490, 880, 1130						490	880	1130
P03-14	34	37	12.9167	Size-Meth Mosaic	0.9	0.14	0.1	0.107609	0.0768636	0	0.00917363	0.013146	0.0284383	0.0172088	-0.0010946	0.0522826	0.0349735	0.0101717	0.0796913	0.0234705	250, 380, 480, 620, 800, 975 (106, 210)		106	210			250	380	480	620	800	975
P11-03	35	38	12	Full mutation		0.0023909	0.00044044	0.00183773	0.000338538	0	0.0330278	0.00206201	-0.000619521	0.031276	-0.0280232	-0.0115187	0.0329001	-0.0292803	0.0144658	0.036	680						680
P06-01	36	39	46	Control		1.4906	0.1522	1.14573	0.116986	1	0.394284	0.387662	0.430673	0.367454	0.414348	0.294058	0.318614	0.417168	1.46687	0.0669529	30	30
P07-38	36	39	46	Control		1.4906	0.1522	1.14573	0.116986	1	0.355797	0.280699	0.401011	0.392422	0.285588		0.350377	0.272652	1.29632	0.079421	30	30
P05-36	37	40	7.08333	Full mutation						0	-0.00299975	0.0380638	0.0341233	-0.0174154	0.0180081	-0.0203428	0.0551564	-0.0189097	0.0415598	0.0406497	380, 520						380	520
P06-06	37	40	7.08333	Full mutation						0	-0.0229064	-0.0234682	0.0350012	0.047476	0.0877729	-0.00440424	-0.0401629	-0.018576	0.0294574	0.0608578	380, 520						380	520
P02-32	38	41	11	Control		1.126	0.0342	0.865484	0.0262873	1	0.193364	0.221456	0.166077	0.161908	0.136334	0.189791	0.209156	0.166208	0.700533	0.0383107	23	23
P06-33	38	42	12.75	Control		1.42	0.1	1.09146	0.0768636	1	0.400004	0.34949	0.299458	0.364476	0.356578	0.329676	0.452055	0.371214	1.41774	0.0628608	23	23
P07-14	38	42	12.75	Control		1.42	0.1	1.09146	0.0768636	1	0.395794	0.324907	0.333498	0.328742	0.272396		0.312524	0.274192	1.24283	0.0611981	23	23
P10-06	39	44	18.25	Size-Meth Mosaic	0.81	2.25	0.0647	1.72943	0.0497307	0	0.0162523	0.0295704	0.0117945	0.00752344	0.0363198	0.024622	0.00459042	0.0686588	0.0966829	0.0285334	300, 450, 600 (160-450)				160	450	300	450	600
P11-04	39	43	13.6667	Size-Meth Mosaic	0.81	2.4896	0.0444	1.9136	0.0341274	1	0.0594239	0.0401166	0.0627687	0.0386614	0.0734195	0.0411291	0.126037	0.0373513	0.232287	0.0410539	300, 450, 600 (160-450)				160	450	300	450	600
P05-24	40	45	5.75	Full mutation		0.00019914	0	0.000153066	0	0	0.00249824	-0.019693	0.0215706		-0.00758915	-0.0291484	0.00252006	-0.0232158	-0.0294111	0.0261653	525						525
P13-11	41	46	10.4167	Full mutation		0.0016	0.004	0.00122982	0.00307454	0	0.000736212	-0.00453151	0.0134319	0.0277748	-0.00833783	0.00492915	0.040937	-0.0450327	0.014506	0.0353918	340, 480						340	480
P05-26	42	47	12.75	Control		1.3392	0.185	1.02936	0.142198	1	0.28818	0.241737	0.247776	0.270109	0.245656	0.191068	0.272671	0.190875	0.944884	0.0494636	30	30
P04-33	44	49	20.4167	Full mutation		0.0525	0.005	0.0403534	0.00384318	0	0.0264825	0.00509645	-0.00401745	0.0124142	0.013776	0.0190333	0.00763801	0.00108295	0.0395333	0.0135086	450						450
P09-15	45	50	16.0833	Size-Meth Mosaic	0.14					1	0.0729688	0.0762033	0.0619701	0.0856428	0.091004	0.0490753	0.00212677	0.0315558	0.228232	0.0412218	250, 360 (170)		170				250	360
P03-10	46	51	24.5833	Meth Mosaic	0.71	2.97	0.11	2.28285	0.0845499	1	0.0286591	0.0442008	0.0484453	0.0219618	-0.00105093	0.0365679	0.0764986	0.0576426	0.15178	0.0322865	470, 620, 800 (~250)		250				470	620	800
P10-21	47	52	19.4167	Control		1.55	0.04	1.19139	0.0307454	1	0.244805	0.22194	0.209542	0.288199	0.129526	0.181946	0.24328	0.208226	0.83788	0.0646834	30	30
P14-32	47	52	19.4167	Control		1.55	0.04	1.19139	0.0307454	1	0.229255	0.202225	0.247824	0.257735	0.257453	0.179807	0.296887		0.926381	0.0570248	30	30
P10-22	48	53	21.6667	Size-Meth Mosaic	0.52	2.4	0.48	1.84473	0.368945	1	0.083236	0.080529	0.0732109	0.0666014	0.0732261	0.092674	0.0320905		0.278032	0.0284036	160, 334, 717, 859 (162)		162				160	334	717	859
P14-33	48	53	21.6667	Size-Meth Mosaic	0.52	2.4	0.48	1.84473	0.368945	1	0.0629467	0.0835168	0.0548539	0.0651376	0.131001		0.0759782		0.306177	0.0434782	160, 334, 717, 859 (162)		162				160	334	717	859
P13-14	49	54	6.91667	Control		1.6286	0.0712	1.2518	0.0547269	1	0.421843	0.369227	0.35928	0.321451	0.289385	0.353558	0.303292	0.384032	1.3591	0.0601541	41	41
P11-30	50	55	23.8333	Size Mosaic		0		0		0	0.0457818	-0.0185923	0.00699728	0.0271005	0.116302	0.106512	-0.00466132	-0.00209097	0.134524	0.0705399	186, 440, 1130						186	440	1130
P04-04	51	56	10.0833	Full mutation		0.003	0.00058206	0.00230591	0.000447392	0	0.0147606	-0.0128359	0.0244473	0.0217351	0.0330439	-0.00693542	0.000308556	-0.0155741	0.0285929	0.0254076	510, 650						510	650
P03-03	52	57	11.5	Full mutation		0		0		0	-0.0368014	0.0229609	-0.00162142	-0.00459958	0.0381174	0.0492265	0.00759997	-0.073706	0.000570562	0.0550508	460, 655, 830, 990						460	655	830	990
P02-31	53	58	4.5	Full mutation		0		0		0	0.0387364	0.0132815	-0.00245392	-0.00175315	0.0600828	0.0260431	0.0368744	0.0311712	0.0979685	0.0293594	220, 380, 530-1000						220	380							530	1000
P08-16	55	60	10.5	Full mutation		0.03	0.003	0.0230591	0.00230591	0	0.0267122	0.0062947	0.0166485	-8.25084e-05	0.00896894	0.0447042	0.0122833	-0.0291955	0.041875	0.0292441	278						278
P06-03	56	61	21	Control		0.9176	0.1108	0.7053	0.0851648	1	0.180623	0.232024	0.233311	0.292079	0.296109	0.233232	0.169179	0.220295	0.900639	0.0623217	30	30
P07-37	56	61	21	Control		0.9176	0.1108	0.7053	0.0851648	1	0.215323	0.216718	0.269648	0.254311	0.211041		0.205789	0.244226	0.896376	0.0363988	30	30
P02-06	57	62	13.5	Full mutation		0.07	0.002	0.0538045	0.00153727	0	0.0136352	0.00685861	0.0157764	0.0137048	-0.0105084	0.00474666	-0.0152794	0.0204806	0.0239678	0.0175865	210, 720, 900						210	720	900
P10-32	58	63	3.66667	Full mutation		0		0		0	0.0324745	-0.00783697	-0.00213884	-0.0169286	0.0074126	0.0359074	0.0961163	-0.0082713	0.0663213	0.0511244	400, 420, 780, 1000						400	420	780	1000
P08-20	59	64	31.5833	Control		1.12	0.12	0.860872	0.0922363	1	0.271339	0.297839	0.318723	0.302843	0.20178	0.194633	0.311731	0.203015	1.0195	0.0740058	28	28
P12-30	60	65	17.5	Meth Mosaic	0.85	0.32	0.02	0.245963	0.0153727	1	0.0294084	0.0851689	0.065172	0.0805208	0.102207	0.0763014	0.0549109	0.0251997	0.251679	0.0370744	273, 408, 810 (340)		340				273	408	810
P06-32	61	66	5.75	Meth Mosaic	0.87	0.48	0.06	0.368945	0.0461181	0	-0.0433998	0.0244174	0.029256	0.00880966	0.0695771	0.0205011	0.0308156	0.076307	0.104905	0.0508036	860, 1030, 1270 (500)		500				860	1030	1270
P05-34	62	67	38.3333	Control		1.0072	0.1144	0.77417	0.0879319	1	0.248112	0.298564	0.254677	0.283888	0.243616	0.233326	0.235257	0.265102	1.00041	0.0319959	31	31
P06-04	62	67	38.3333	Control		1.0072	0.1144	0.77417	0.0879319	1	0.486815	0.464924	0.496177	0.492463	0.416248	0.431183	0.25383	0.374077	1.65674	0.112424	31	31
P05-22	63	68	9.08333	Full mutation						0	0.0142171	0.0145057	0.015733	0.0110385	-0.00672342	0.00674135	0.026227	0.00137193	0.0403119	0.0137078	380, 580, 870						380	580	870
P02-01	64	71	10.25	Size-Meth Mosaic	0.68	0.38	0.02	0.292082	0.0153727	0	0.0435462	0.00504899	0.0175892	-0.0113094	0.104837	0.096928	0.0773442	0.0771372	0.199408	0.0603576	250, 320, 370, 450 (30-200)				30	200	250	320	370	450
P05-19	64	70	9.33333	Size-Meth Mosaic	0.68	0.41	0.01	0.315141	0.00768636	0	-0.00791197	-0.00960717	0.0437232	-0.0257819	0.0744521	0.0506212	0.0507608	0.0220399	0.0961806	0.0491483	250, 320, 370, 450 (30-200)				30	200	250	320	370	450
P12-12	64	69	8.25	Size-Meth Mosaic	0.68	0.58	0.02	0.445809	0.0153727	0	0.0239046	0.0291723	0.0366447	0.020663	0.0518162		0.00100014	0.0106465	0.0963682	0.0244969	250, 320, 370, 450 (30-200)				30	200	250	320	370	450
P14-16	64	69	8.25	Size-Meth Mosaic	0.68	0.58	0.02	0.445809	0.0153727	1	0.0276094	0.0297271	0.0233688	0.0299783	0.0659159	0.0806512	0.00433861		0.145006	0.0387268	250, 320, 370, 450 (30-200)				30	200	250	320	370	450
P01-21	65	72	6.25	Control		1.2764	0.0796	0.981086	0.0611834	1	0.266324	0.307922	0.303634	0.244947	0.252967	0.259068	0.343315	0.258952	1.08509	0.0474492	29	29
P05-35	66	73	18.9167	Control		1.3375	0.1047	1.02805	0.0804761	1	0.209098	0.209183	0.221519	0.214451		0.184281	0.171733	0.145153	0.751344	0.04065	29	29
P13-01	67	74	9.83333	Control		1.2312	0.0607	0.946344	0.0466562	1	0.339289	0.366093	0.346093	0.410962	0.346401	0.295881	0.307438	0.313193	1.32189	0.0505843	30	30
P02-25	68	75	7.91667	Size-Meth Mosaic	0.9	0.0658	0.0027336	0.0505762	0.00210114	0	0.0318277	0.0252046	0.00561155	0.0174357	0.0243604	-0.0241802	0.0300039	0.0113393	0.0589817	0.0250951	345, 480, 650, 1100 (30,76)		30	76			345	480	650	1100
P12-10	69	76	11	Full mutation		0		0		0	0.0215788	-0.0261036	-0.0267885	0.0128266	0.0413154	0.0451192	0.0235899	0.0409813	0.0642765	0.0395328	210, 340, 550						210	340	550
P14-15	69	76	11	Full mutation		0		0		0	0.00726975	0.0112101	0.0475202	0.0219225	0.0396262	0.0673451	0.0468878		0.134026	0.0320768	210, 340, 550						210	340	550
P03-19	70	77	3.5	Full mutation		0.02	0	0.0153727	0	0	0.00428424	0.00986134	0.0165375	0.0515635	-1.24439e-05	0.0251406	0.0412196	0.00395938	0.073994	0.0258514	250, 360, 525, 665, 885						250	360	525	665	885
P07-15	70	77	3.5	Full mutation		0.02	0	0.0153727	0	0	0.0195581	0.0600963	-0.0037876	0.0453575	0.0517206	-0.0285389	0.0560901	-0.0278312	0.0837486	0.0511983	250, 360, 525, 665, 885						250	360	525	665	885
P09-12	71	78	26.5	Control		1.0441	0.086	0.802532	0.0661027	1		0.302831	0.31206	0.303162	0.317544	0.308845	0.307778	0.295211	1.19038	0.0105681	29	29
P03-08	72	79	18.1667	Control		1.4706	0.2321	1.13036	0.1784	1	0.325449	0.26159	0.295887	0.316829	0.304324	0.285752	0.217233	0.260344	1.09977	0.0488354	29	29
P02-19	73	81	49.8333	Control		1.06	0.07	0.814754	0.0538045	1	0.221034	0.210214	0.266001	0.222662					0.892378	0.0478104	32	32
P08-14	73	82	52	Control		1.25	0.05	0.960794	0.0384318	1	0.206512	0.187914	0.196699	0.226615	0.264084	0.0773296	0.156617	0.246995	0.757997	0.0802957	32	32
P13-13	73	80	46.8333	Control		1.259	0.0701	0.967712	0.0538814	1	0.289862	0.306919	0.308416	0.33419	0.255337	0.299208	0.283341	0.28984	1.14813	0.0312472	32	32
P03-01	74	83	36.4167	Control		1.5798	0.1361	1.21429	0.104611	1	0.325507	0.296277	0.290711	0.344371	0.245651	0.263859	0.250105	0.312928	1.12985	0.049228	31	31
P01-14	75	84	6.16667	Control		1.1398	0.0843	0.876091	0.064796	1	0.205678	0.163704	0.122779	0.170184					0.642522	0.0659314	29	29
P05-27	76	85	5.83333	Size-Meth Mosaic	0.95	0.0459	0.0044439	0.0352804	0.00341574	0	0.0123053	0.0179928	0.011188	0.0475256	-0.0133982	0.00686565	-0.00750721	-0.0571809	0.00862929	0.0413915	480, 610, 710, 840, 970, 1210-1540 (100)		100				480	610	710	840	970				1210	1540
P06-18	76	85	5.83333	Size-Meth Mosaic	0.95	0.0459	0.0044439	0.0352804	0.00341574	0	0.0179616	-0.00882655	0.0221674	0.0119693	0.0637071	0.0240113	0.00798597		0.0770381	0.0326569	480, 610, 710, 840, 970, 1210-1540 (100)		100				480	610	710	840	970				1210	1540
P08-34	77	86	3.58333	Full mutation		0.0002	6e-05	0.000153727	4.61181e-05	0	0.0216006	0.0217923	0.00472711		0.0172997		0.0119905		0.0600747	0.0125261	410						410
P12-22	78	87	29.6667	Control		0.8603	0.0234	0.661257	0.0179861	1	0.173592	0.184867	0.14156	0.162956	0.126105	0.143597	0.147069	0.111448	0.577771	0.0332364	30	30
P05-21	79	88	6.83333	Full mutation		0.03	0.0001	0.0230591	7.68636e-05	0	0.0222051	-0.00309368	-0.0133078	0.00165711	0.0285916	-0.0586157	-0.0297564	0.0149366	-0.0181321	0.039726	280, 360, 550, 690, 800						280	360	550	690	800
P11-12	80	89	30.0833	Control		1.3079	0.0606	1.0053	0.0465793	1	0.295347	0.314081	0.333396	0.310613	0.292976	0.319446	0.33138	0.355954	1.23839	0.0286709	39	39
P11-16	81	90	62.3333	Control		1.64	0.01	1.26056	0.00768636	1	0.257835	0.255903	0.251723	0.2168	0.202742	0.151929	0.245263	0.212355	0.87042	0.0497787	30	30
P02-04	82	91	64.9167	Control		1.18	0.02	0.90699	0.0153727	1	0.214539	0.180939	0.229866	0.211084	0.200852	0.141866	0.130961	0.205397	0.735073	0.0488429	29	29
P09-28	83	92	2.66667	Full mutation		0.11	0.0111	0.0845499	0.00853185	0	0.0174634	0.105289	0.0251047	0.0334989	0.0197518	0.00270608	0.0509101	0.0739223	0.159405	0.0466554	340						340
P14-30	83	92	2.66667	Full mutation		0.11	0.0111	0.0845499	0.00853185	0	-0.00237188	0.0402585	-9.59311e-05	-0.00569196	-0.0208782	0.0577308	0.0237903		0.0514091	0.0413295	340						340
P04-12	84	93	11.6667	Full mutation		0.03	0.002	0.0230591	0.00153727	0	0.0195411	-0.000376479	-0.00920618	0.00561307	0.00109431	-0.0109308	0.00774918	0.000971353	0.00701142	0.0132585	585, 740						585	740
P07-06	84	93	11.6667	Full mutation		0.03	0.002	0.0230591	0.00153727	0	0.017018	0.0149853	0.00572618	0.0204677	-0.0111616	0.00574548	-0.00552064	0.000809658	0.0233157	0.015257	585, 740						585	740
P06-19	85	94	5.75	Control		0.9806	0.0321	0.753724	0.0246732	1	0.422497	0.469829	0.408953	0.415366	0.353743	0.325201	0.383892	0.422146	1.5529	0.0617513	31	31
P07-24	85	94	5.75	Control		0.9806	0.0321	0.753724	0.0246732	1	0.454008	0.436986	0.475195	0.416325	0.378718	0.374549	0.383814	0.357525	1.58952	0.0582712	31	31
P02-23	86	95	6.25	Control		1.14	0.11	0.876245	0.0845499	1	0.218661	0.196616	0.211774	0.229792	0.213944	0.178424	0.191037	0.218636	0.804618	0.0234198	31	31
P11-01	87	96	4.5	Control		1.0224	0.1039	0.785853	0.0798612	1	0.311097	0.294079	0.342252	0.306879	0.259423	0.304056	0.336954	0.287685	1.18466	0.0364666	30	30
P06-02	88	97	29.1667	Control		1.3149	0.0025276	1.01068	0.0019428	1	0.307251	0.304753	0.269166	0.35235	0.224788	0.411566	0.268299	0.21238	1.1401	0.0901798	29	29
P02-33	89	98	8.58333	Control		1.3885	0.0507	1.06725	0.0389698	1	0.252633	0.274234	0.312434	0.28008	0.2161	0.235861	0.287666	0.238705	1.01746	0.0436884	24	24
P08-17	90	99	24.5833	Size-Meth Mosaic	0.94	0.06	0.005	0.0461181	0.00384318	0	0.00235381	0.0226038	0.021712	0.0313253	0.0377269	0.0651871	0.00738487	0.0493143	0.115248	0.0287352	540, 660, 880 (89)		89				540	660	880
P03-16	91	100	4	Full mutation		0		0		0	0.0233167	-0.00342246	-0.014316	-0.0195455	-0.011902	0.0607254			0.022542	0.0489238	720						720
P09-13	92	101	4	Control		1.2496	0.113	0.960487	0.0868558	1	0.136008	0.188399	0.156855	0.201293	0.211409	0.198457	0.193882	0.191278	0.71668	0.03465	33	33
P09-16	93	103	7.83333	Size-Meth Mosaic	0.1	4.91	0.17	3.774	0.130668	1	0.0778205	0.106717	0.0674808	0.0712362	0.0200214	0.136231	-0.0238195	0.100495	0.269768	0.0696288	182 (200-400)				200	400	182
P13-10	93	102	4.83333	Size-Meth Mosaic	0.1	4.8736	0.0567	3.74602	0.0435816	1	0.078663	0.125125	0.119337	0.0854524	0.0844074	0.0644248	0.135095	0.176134	0.42132	0.0508576	182 (200-400)				200	400	182
P10-37	94	104	9	Full mutation		0.0878	0.0037584	0.0674862	0.00288884	0	0.00488651	0.0271468	0.0199177	0.0188704	0.0347761	0.0682593	-0.0371272	-0.0424195	0.0457437	0.050402	370						370
P13-12	95	105	1.83333	Full mutation		0		0		0	0.0263989	0.00901995	-0.000314667	-0.0026201	0.0416281	0.0301463	0.00592209	-0.0236391	0.0419757	0.0287985	440, 520, 620, 810						440	520	620	810
P10-38	96	106	9.75	Meth Mosaic	0.93	0.2537	0.0071028	0.195003	0.00545946	0	0.0171803	-0.00698222	0.00678473	0.00258908	0.0317296	0.00868846	0.0157837	-0.00580445	0.0339375	0.0175822	220, 380, 510, 620, 720 (240)		240				220	380	510	620	720
P02-24	97	107	24.5833	Control		0.99	0.0446	0.760949	0.0342811	1	0.276107	0.2895	0.269391	0.281866	0.278627	0.208888	0.226093	0.205411	0.987475	0.0479229	30	30
P03-02	97	329	24.4167	Control		0.99	0.0446	0.760949	0.0342811	1	0.264486	0.296147	0.254018	0.271599	0.260041	0.294359	0.23581	0.212219	1.01308	0.0385817	30	30
P12-23	98	108	26.8333	Control		0.8643	0.0293	0.664332	0.022521	1	0.356749	0.342159	0.306792	0.333065	0.248286	0.289855	0.311482	0.231801	1.17388	0.0605732	30	30
P04-26	99	109	29.0833	Full mutation		0.3946	0.0269	0.303304	0.0206763	0	0.0019165	0.0214472	0.00604684	0.0258522	0.0291643	0.00417593	0.0143993	0.0290082	0.0640298	0.0156163	630 light smear						630										light smear
P12-24	100	110	48.5	Control		0.9317	0.0473	0.716138	0.0363565	1	0.256645	0.263709	0.238934	0.260565	0.322315	0.213255	0.238127	0.231897	0.982413	0.0447061	30	30
P09-11	101	111	32.25	Full mutation		0.0215	0.0022833	0.0165257	0.00175503	0	0.0223478	-0.0355661	0.0510579	0.0217554	0.0165639	-0.0250602	-0.0225071	0.00795108	0.0177245	0.0406631	250, 330, 380						250	330	380
P11-13	102	112	5.5	Size-Meth Mosaic	0.88	0.19	0.0001	0.146041	7.68636e-05	0	0.0239141	0.0333868	0.0295496	0.0156682	0.017741	0.0107383	-0.0027787	0.00725647	0.0657105	0.0164091	600, 660 (640, 99)		99	640			600	660
P06-31	103	113	4.33333	Full mutation		0	0	0	0	0	0.00794516	0.0184819	0.00598059	0.0290415	-0.00714385	0.0329797	-0.00300346	0.0387945	0.0596962	0.0234379	350, 460, 590						350	460	590
P11-11	104	114	1.83333	Meth Mosaic	0.9	0.0863	0.0024486	0.0663332	0.00188208	0	0.0243143		-0.0139704	0.00943917	0.053311	-0.0425251	-0.0256558	0.101659	0.0590759	0.0730763	285 (360)		360				285
P11-18	104	115	3.91667	Meth Mosaic	0.9	0.16	0.01	0.122982	0.00768636	0	0.0250142	-0.00216401	0.0172115	0.0460944	0.0129557	0.0173264	0.00682799	0.00358115	0.0615254	0.0205295	285 (360)		360				285
P11-22	105	116	14.6667	Size-Meth Mosaic	0.89	0.3026	0.0124	0.232589	0.00953108	0	0.0355098	0.00779184	0.0190003	-0.0137211	-0.0146113	0.0355403	0.0367687	-0.0646661	0.0201835	0.0482667	260, 590, 795, 960 (110)		110				260	590	795	960
P06-17	106	117	9.08333	Size-Meth Mosaic	0.84	0.895	0.045	0.687929	0.0345886	1	0.0833524	0.158705	0.0856473	0.127308	0.00966613	0.13891	0.0928451	0.137252	0.404367	0.06486	250, 370, 430, 610, 740 (113)		113				250	370	430	610	740
P07-25	106	117	9.08333	Size-Meth Mosaic	0.84	0.895	0.045	0.687929	0.0345886	0	0.0181293	0.0630444	0.0646583	0.0419558	0.0151683	0.0533699	0.0561498	0.0418515	0.171861	0.0260996	250, 370, 430, 610, 740 (113)		113				250	370	430	610	740
P09-10	107	118	75.9167	Control		1.3053	0.0808	1.0033	0.0621058	1	0.358575	0.321178	0.328235	0.327534	0.323994	0.308838	0.300532	0.337053	1.26397	0.0241021	32	32
P03-07	109	120	4.25	Full mutation		0.0428011	0.00133767	0.0328984	0.00102818	0	0.020043	0.0125853	0.0536811	0.00526696	0.023869	0.0203196	0.0324438	0.0155018	0.0891061	0.0202579	300, 520, 640, 960						300	520	640	960
P01-13	110	121	34.25	Control		0.966782	0.039553	0.743103	0.0304019	1	0.36687	0.359394	0.397634	0.26998	0.271466	0.269195	0.284683	0.26101	1.203	0.0754023	30	30
P04-24	111	122	11.8333	Full mutation		0.21	0.02	0.161413	0.0153727	0	0.0216806	-0.00114155	0.0103521	0.0172997	0.0482331	0.0615246	0.0279152	0.0366654	0.107935	0.0280349	300, 640, 760, 980						300	640	760	980
P10-07	111	123	13.8333	Full mutation		0.09	0.01	0.0691772	0.00768636	0	0.0116175	0.0228932	0.0252803	0.0128362	0.00539311	0.0269294	-0.0193355	0.0180723	0.0502916	0.0205705	300, 640, 760, 980						300	640	760	980
P12-25	112	124	22.9167	Control		1.2845	0.0554236	0.987315	0.0426005	1	0.257325	0.233637	0.254091	0.231141	0.225331	0.221121	0.239484	0.238499	0.921872	0.0175449	20	20
P01-12	113	125	42.25	Control		1.4431	0.0217	1.10922	0.0166794	1	0.338232	0.373374	0.402789	0.337764	0.276961	0.355628	0.358267	0.327869	1.34398	0.050379	29	29
P04-01	114	126	45.4167	Control		1.57	0.01	1.20676	0.00768636	1	0.378309	0.44134	0.394121	0.364271	0.287116	0.248591	0.23145	0.275101	1.27094	0.105198	40	40
P04-07	114	127	48.0833	Control		1.8	0.05	1.38354	0.0384318	1	0.434877	0.436137	0.51209	0.401724	0.388461	0.296081	0.343426	0.302452	1.51101	0.100866	40	40
P11-09	115	128	37.6667	Control		0.954965	0.0691861	0.73402	0.0531789	1	0.180252	0.215398	0.209984	0.186716	0.21967	0.152569	0.216704	0.238839	0.785821	0.0376658	30	30
P07-23	116	129	24.6667	Full mutation		0		0		0	0.00689905	-0.0198333	0.0341128	0.0112705	-0.0709655	0.06206	-0.00394504	-0.00997142	0.0046695	0.0536933	407, 678, 845, 1163						407	678	845	1163
P04-03	117	130	66.3333	Control		1.57	0.1895	1.20676	0.145656	1	0.126039		0.101751	0.0974148	0.133796	0.103958	0.0926251	0.0818874	0.4088	0.0269596	20	20
P04-18	118	132	5.16667	Size-Meth Mosaic	0.88	0.09	0.01	0.0691772	0.00768636	0	0.0257051	0.00937042	0.00561042	0.0198186	-0.0208725	0.0631775	0.0496496	-0.010977	0.0686238	0.0390904	910, 1050 (130)		130				910	1050
P07-21	118	132	5.16667	Size-Meth Mosaic	0.88	0.09	0.01	0.0691772	0.00768636	0	0.0107805	0.00418934	-0.00992377	0.0244602	-0.014929	-0.00942744	-0.00368239	0.0116002	0.00633819	0.018472	910, 1050 (130)		130				910	1050
P08-31	118	131	4.75	Size-Meth Mosaic	0.88	0.15	0.02	0.115295	0.0153727	0	0.0731825	0.0179336	0.0380566	0.00590676	0.0356458	0.0146173	-0.0257066	-0.0306982	0.0625394	0.046868	910, 1050 (130)		130				910	1050
P09-19	119	133	17.5	Meth Mosaic	0.93	0.21	0.01	0.161413	0.00768636	0	-0.0411522	-0.021574	-0.0263174	0.020417	0.000569785	0.0260649	-0.0170707	0.0222906	-0.0178357	0.0350431	220, 410, 670, 900, 1100 (270-370)				270	370	220	410	670	900	1100
P01-15	120	134	12.25	Full mutation						0	0.0188316	-0.001462	-0.00961538	0.00203252	-0.0442395	-0.0200994	0.00594558	-0.0209888	-0.0337562	0.026868	220, 510, 600, 690, 860, 1100						220	510	600	690	860	1100
P10-28	121	135	3.66667	Full mutation		0.00255	0.00255	0.00196002	0.00196002	0	-0.0115747	-0.0174953	0.0119141	-0.0134769	-0.0376208	0.0279022	0.0384184	0.0408945	0.0188976	0.0398828	210, 390						210	390
P11-08	122	136	12.9167	Control		1.6189	0.0172	1.24434	0.0132205	1	0.273611	0.256534	0.244094	0.216071	0.305825	0.213519	0.267165	0.288003	1.00151	0.0447473	29	29
P14-01	122	136	12.9167	Control		1.6189	0.0172	1.24434	0.0132205	1	0.34112	0.308087	0.312953	0.360632	0.31539	0.314124	0.279279		1.23703	0.0378319	29	29
P10-16	123	137	53.9167	Size-Meth Mosaic		3.09	0.17	2.37508	0.130668	1	0.0630103	0.0674093	0.0419268	0.0429264	0.0175455	-0.0152743	0.0572761	0.0443761	0.154821	0.0372834	150-670														150	670
P14-24	123	137	53.9167	Size-Meth Mosaic		3.09	0.17	2.37508	0.130668	1	0.0255417	0.0370174	0.0438166	0.0538418	0.0329557	0.0331539	0.0751535		0.167119	0.0246172	150-670														150	670
P03-21	124	138	1.41667	Meth Mosaic	0.47	0.4	0.04	0.307454	0.0307454	0	0.0014877	0.00780736	0.00633825	0.0121893	0.0319161		0.0113887	0.0147148	0.0475846	0.0142204	340 (315-480)				315	480	340
P05-03	124	139	4.5	Meth Mosaic	0.47	0.19	0.01	0.146041	0.00768636	0	0.0132768	-0.00109198	0.0217215	-0.00305324	-0.0335468	0.0326987	-0.0254736	0.0554348	0.0290858	0.0405831	340 (315-480)				315	480	340
P04-28	125	140	6.25	Full mutation		0.00044867	0	0.000344864	0	0		0.00253386	-0.0110836		0.0121612	-0.0143518	0.0108353	-0.005763	-0.00366564	0.0177591	720, 910, 1150, 1340						720	910	1150	1340
P07-26	125	140	6.25	Full mutation		0.00044867	0	0.000344864	0	0	-0.0114437	0.00385169	-0.00283056	0.00163901	0.00698433	-0.0235924			-0.0164211	0.018123	720, 910, 1150, 1340						720	910	1150	1340
P10-14	126	141	10.6667	Size-Meth Mosaic	0.84	0.6327	0.0444	0.486316	0.0341274	1	0.0539494	0.0666494	0.0704766	0.0257167	0.047012	0.0216655	0.0499548	0.0272196	0.175895	0.0257078	520, 780, 980 (173)		173				520	780	980
P11-07	127	142	33	Control		1.1906	0.1542	0.915137	0.118524	1	0.339351	0.270443	0.271579	0.241274	0.241297	0.237156	0.288798	0.301784	1.06304	0.0485818	23	23
P14-04	127	142	33	Control		1.1906	0.1542	0.915137	0.118524	1	0.120812	0.132254	0.135187	0.124122	0.159329	0.20055	0.174676		0.580341	0.0436129	23	23
P01-16	128	143	7.83333	Control		1.2663	0.1206	0.973323	0.0926974	1	0.328606	0.328749	0.348502	0.328641	0.338026	0.359658	0.373479	0.362368	1.34259	0.0242152	29	29
P07-27	128	143	7.83333	Control		1.2663	0.1206	0.973323	0.0926974	1	0.36972	0.34404	0.334594	0.362527	0.286356	0.327903	0.250402		1.26139	0.0625942	29	29
P11-20	128	144	9.16667	Control		1.49	0.07	1.14527	0.0538045	1	0.3909	0.294904	0.358044	0.348545	0.312995	0.248103	0.274708	0.289607	1.22122	0.065362	29	29
P04-29	129	145	25.75	Control		1.1288	0.0392	0.867636	0.0301305	1	0.21674	0.224227	0.238954	0.219617	0.202027	0.217273	0.190579	0.190143	0.824346	0.0232976	30	30
P07-28	129	145	25.75	Control		1.1288	0.0392	0.867636	0.0301305	1	0.313344	0.294129	0.279164	0.25591	0.202356	0.259149	0.196975	0.214335	0.977521	0.0596938	30	30
P12-26	130	146	3.25	Full mutation		0	0	0	0	0	-0.000433765	0.00458823	0.016614	-0.0246618	0.0664408	0.031151	-0.0190875	-0.00211209	0.0351646	0.0401715	630						630
P14-05	130	146	3.25	Full mutation		0	0	0	0	0	0.0234942	0.00345913	-0.00642354	0.00708548	0.00144987	-0.0127227	0.0466411		0.0349134	0.0295032	630						630
P05-02	131	148	62.8333	Control		0.98	0.05	0.753263	0.0384318	1	0.226819	0.183059		0.22883	0.17977	0.187227	0.197492	0.20447	0.780307	0.0295009	32	32
P11-06	131	147	59.9167	Control		1.1365	0.0152	0.873554	0.0116833	1	0.170316	0.202164	0.17671	0.208093	0.215262	0.27242	0.211672	0.239524	0.822698	0.044947	32	32
P14-03	131	147	59.9167	Control		1.1365	0.0152	0.873554	0.0116833	1	0.268246	0.294894	0.258601	0.281703	0.331441	0.257443	0.248828		1.07603	0.0418981	32	32
P02-20	132	150	47.8333	Control		1.64	0.07	1.26056	0.0538045	1	0.131958	0.163181	0.198201	0.123346	0.113461	0.19149	0.272313	0.266075	0.708163	0.084524	30	30
P09-07	132	149	46	Control		1.4306	0.0352	1.09961	0.027056	1	0.250426	0.295375		0.245586	0.284798	0.256333	0.310377	0.218791	1.03198	0.0470192	30	30
P14-06	132	149	46	Control		1.4306	0.0352	1.09961	0.027056	1	0.215179	0.243994	0.250596	0.212515	0.260421	0.255089	0.224924		0.921688	0.0288955	30	30
P04-30	133	151	10.0833	Full mutation		0		0		0	-0.00947555	0.00146501	0.0147147	-0.00735332	0.0176315	-4.96091e-05	0.0192062	-0.0240596	0.00585888	0.0207598	490						490
P07-29	133	151	10.0833	Full mutation		0		0		0	0.0130509	0.0206752	-0.00582891	0.00478909	-0.002514	-0.0165167	0.0517284	-0.0380246	0.0132702	0.0365255	490						490
P12-08	134	152	21.9167	Control		1.3941	0.0549	1.07155	0.0421981	1	0.250779	0.169573	0.226134	0.257478	0.252938	0.184936	0.226332	0.207844	0.86143	0.0446132	27	27
P09-34	135	153	59.5	Control		1.1437	0.0932	0.879088	0.0716368	1	0.288036	0.247118	0.257424	0.233416	0.245471	0.3193	0.293278	0.295467	1.05714	0.0418703	31	31
P14-12	135	153	59.5	Control		1.1437	0.0932	0.879088	0.0716368	1	0.228164	0.21272	0.252616	0.226978	0.159689	0.145498	0.142835		0.758596	0.0660593	31	31
P01-07	136	154	2.5	Full mutation		0.0113	0.00046308	0.00868558	0.00035594	0	0.00684399	0.00372103	0.0173349	0.0367876	0.00108459	-0.0353605	0.05918	0.0237661	0.0549825	0.0381984	410, 700, 1090						410	700	1090
P12-09	137	155	8.33333	Full mutation		0.0521	0.0079218	0.0400459	0.00608898	0	0.0159927		0.0212762	0.0131455	0.0161973	-0.00344251	0.0358524	0.0168025	0.0642044	0.0170058	600, 820						600	820
P14-08	137	155	8.33333	Full mutation		0.0521	0.0079218	0.0400459	0.00608898	0	0.0427738	0.00652843	0.0456257	0.030025	0.0370792	0.0624452	0.0860972		0.17216	0.0367283	600, 820						600	820
P08-28	138	156	1.75	Size-Meth Mosaic	0.78	0.8444	0.0934	0.649036	0.0717906	0	0.0203483	0.0389	0.0127807	0.0400474	0.0194572	0.0336715	0.0590187	0.0439081	0.130053	0.0209413	440, 550, 970 ,980 (155)		155				440	550	970	980
P14-10	138	156	1.75	Size-Meth Mosaic	0.78	0.8444	0.0934	0.649036	0.0717906	1	0.0354986	0.0532534	0.0692686	0.0990317	0.0781062	0.0806283	0.0862625		0.278299	0.0313215	440, 550, 970 ,980 (155)		155				440	550	970	980
P11-29	139	157	10.75	Full mutation		0.00021622	1.701e-05	0.000166194	1.30745e-05	0	0.0201442	0.00866343	-0.00697537	0.0238984	-0.0131825	-0.0117605	-0.0061699	0.0329099	0.0230526	0.0246039	700						700
P14-09	139	157	10.75	Full mutation		0.00021622	1.701e-05	0.000166194	1.30745e-05	0	0.0111463	0.0248763	0.0212258	0.0135132	-0.0135753	0.0292629	0.038883		0.0694749	0.0245753	700						700
P08-29	140	158	47.8333	Control		1.198	0.0472	0.920825	0.0362796	1		0.206468	0.19916	0.198011	0.202172		0.191525	0.218733	0.786449	0.0147061	20	20
P14-13	140	158	47.8333	Control		1.198	0.0472	0.920825	0.0362796	1	0.156471	0.173511	0.164982	0.138365	0.121596	0.110563	0.146171		0.56079	0.0334503	20	20
P04-09	141	159	37	Control		1.3598	0.0367	1.04519	0.0282089	1	0.224367	0.26329	0.233406	0.216634	0.189162	0.230256		0.160511	0.84126	0.0486706	30	30
P07-02	141	159	37	Control		1.3598	0.0367	1.04519	0.0282089	1	0.217616	0.239379	0.171381	0.198016	0.1884	0.197289	0.248485	0.240531	0.825092	0.038601	30	30
P08-30	142	160	1.08333	Size-Meth Mosaic	0.9	0.19	0.001	0.146041	0.000768636	0	-0.00165594	0.010367	0.0532338	0.0325664	0.00212882	-0.0236296	0.0394813	0.0809487	0.0938255	0.0463828	410, 820, 930, 1120 (175) +deletion		175				410	820	930	1120							plus deletion
P12-11	143	161	8.75	Control		1.09	0.06	0.837813	0.0461181	1	0.174578	0.164258	0.158836	0.162688	0.138094	0.0870638	0.062591	0.0650678	0.491426	0.0648467	29	29
P06-37	144	162	59.6667	Control		1.08	0.04	0.830126	0.0307454	1	0.366814	0.402489	0.392713	0.357666	0.484849	0.383592	0.406879	0.361308	1.53092	0.0561521	29	29
P07-07	144	162	59.6667	Control		1.08	0.04	0.830126	0.0307454	1	0.325129	0.295967	0.275187	0.336904	0.297114	0.265423	0.246449	0.218992	1.09674	0.0540111	29	29
P09-33	145	163	3.75	Size-Meth Mosaic	0.35	2.43	0.1	1.86778	0.0768636	1	0.0860619	0.0795049	0.0290635	0.0652489	0.0940117	0.0245623	0.0191384	0.1311	0.256434	0.0540994	250 (185)		185				250
P14-17	145	163	3.75	Size-Meth Mosaic	0.35	2.43	0.1	1.86778	0.0768636	1	0.0440865	0.0387512	0.085563	0.0413682	0.0280336	0.0221716	0.0508236		0.172283	0.0301685	250 (185)		185				250
P12-31	146	164	9.25	Size-Meth Mosaic	0.92	0.11	0.004	0.0845499	0.00307454	1	0.0400559	0.0375439	0.0350036	0.0292339	0.0431834	0.0396799			0.145317	0.00769993	440, 565, 662, 798, 958 (75)		75				440	565	662	798	958
P14-18	146	164	9.25	Size-Meth Mosaic	0.92	0.11	0.004	0.0845499	0.00307454	0	0.00248054	0.00987508	0.00796494	0.0342384	0.0584733	0.0182417	0.0370466		0.0933045	0.0294317	440, 565, 662, 798, 958 (75)		75				440	565	662	798	958
P07-08	147	165	65.4167	Control		1.11	0.01	0.853185	0.00768636	1	0.254022	0.3284	0.347048	0.280192	0.248355	0.247928	0.28418	0.348452	1.13429	0.0591923	31	31
P10-15	148	166	1.91667	Meth Mosaic	0.76	0.2	0.03	0.153727	0.0230591	0	0.0165286	0.0204534	0.00231824	0.00846607	0.0128191	0.0419458	0.0450841	-0.023404	0.0602469	0.0299855	260, 360, 480 (300-480)				300	480	260	360	480
P14-19	148	166	1.91667	Meth Mosaic	0.76	0.2	0.03	0.153727	0.0230591	0	0.00730464	0.00747943	0.0128671	0.0163853	0.000720667	0.0243378			0.0446846	0.0130726	260, 360, 480 (300-480)				300	480	260	360	480
P06-34	149	167	61.1667	Control		1.08	0.07	0.830126	0.0538045	1	0.399406	0.438597	0.39427	0.447132	0.29032	0.472542	0.369766	0.310016	1.5143	0.0887391	33	33
P07-10	149	167	61.1667	Control		1.08	0.07	0.830126	0.0538045	1	0.317883	0.298106	0.323154	0.291588	0.249558		0.265363	0.2387	1.09998	0.0483514	33	33
P09-30	150	168	19.5833	Control		0.98	0.03	0.753263	0.0230591	1	0.147302	0.146341	0.159427	0.173798	0.228921	0.159725	0.243357	0.168647	0.692396	0.0507829	38	38
P14-21	150	168	19.5833	Control		0.98	0.03	0.753263	0.0230591	1	0.165291	0.189151	0.212037	0.143614	0.161699	0.147058	0.144229		0.644725	0.0379063	38	38
P10-18	151	169	37.8333	Control		1.09	0.09	0.837813	0.0691772	1	0.233432	0.242468	0.23558	0.21726	0.222142	0.236331	0.234899	0.258582	0.912203	0.0171695	30	30
P14-27	151	169	37.8333	Control		1.09	0.09	0.837813	0.0691772	1	0.230194	0.234752	0.240144	0.233154	0.230903	0.214486	0.240504		0.900301	0.0128242	30	30
P10-20	152	170	8.08333	Control		1.84	0.15	1.41429	0.115295	1	0.352397	0.374112	0.345639	0.303271	0.282901	0.312338	0.292145	0.300545	1.24331	0.0449144	30	30
P14-29	152	170	8.08333	Control		1.84	0.15	1.41429	0.115295	1	0.334502	0.303725	0.321563	0.330889	0.306037	0.307758	0.271099		1.20598	0.0313377	30	30
P04-16	153	171	31.3333	Full mutation		0.29	0.04	0.222904	0.0307454	0	-0.000250613	0.00963217	0.000882486	0.0203299	-0.00422852	-0.0102705	0.0267914	-0.00609658	0.0178444	0.018082	195, 600, 640						195	600	640
P07-16	153	171	31.3333	Full mutation		0.29	0.04	0.222904	0.0307454	0	0.0317799	-0.0179158	0.0302175	-0.0239862	0.0552759	-0.0333177	0.0996872	0.00991141	0.0735567	0.0616714	195, 600, 640						195	600	640
P08-32	154	172	9.58333	Full mutation		0.09	0.004	0.0691772	0.00307454	0	0.0546126	0.0108908	0.0113097	0.0188538	0.0470721	0.0430155	-0.00836257	0.0589644	0.114641	0.0336615	700						700
P04-14	155	173	0	Size-Meth Mosaic	0.55	1.43	0.05	1.09915	0.0384318	1	0.0162361	0.0254623	0.0405257	0.0312132	0.0353536	-0.00234699	0.00926063	-0.010063	0.0706413	0.0249728	280, 470, 610, 930, 1160 (190)		190				280	470	610	930	1160
P12-15	156	174	22.5	Control		1.29	0.13	0.99154	0.0999226	1	0.233831	0.213917	0.201981	0.238347	0.230694		0.250122	0.206041	0.873027	0.0263163	24	24
P14-22	156	174	22.5	Control		1.29	0.13	0.99154	0.0999226	1	0.258725	0.31254	0.244411	0.271773	0.246143	0.28945	0.233886		1.02934	0.0410042	24	24
P08-33	157	175	14.5833	Control		1.2	0.16	0.922363	0.122982	1		0.354299	0.361404		0.356321				1.38658	0.00820139	30	30
P14-23	157	175	14.5833	Control		1.2	0.16	0.922363	0.122982	1	0.401556	0.463774	0.547342	0.476126	0.376117	0.499624	0.411879		1.76077	0.0887455	30	30
P04-15	158	176	2.33333	Full mutation		0.02	0	0.0153727	0	0	-0.00282477	0.000597719	0.000720328	-0.00230297		0.0194123	0.00141002	0.0144579	0.0174449	0.012849	210, 390, 485, 675, 785, 880						210	390	485	675	785	880
P07-12	158	176	2.33333	Full mutation		0.02	0	0.0153727	0	0	0.0255187	0.0312855	-0.0263831	0.0237838	-0.00914335	-0.0364441	0.00258071	-0.0106229	0.000279004	0.0344846	210, 390, 485, 675, 785, 880						210	390	485	675	785	880
P11-05	158	177	4.5	Full mutation		0.02	0.001	0.0153727	0.000768636	0	0.0175786	0.000750253	0.00583772	0.00934512		0.0278273		0.0139544	0.0486932	0.0151151	210, 390, 485, 675, 785, 880						210	390	485	675	785	880
P12-16	159	178	6.16667	Full mutation		0.0004	4e-05	0.000307454	3.07454e-05	0	0.0362638	0.00124279	-0.00481373	0.0103311	0.0365689	0.0354818	-0.00478061	0.0745797	0.0896703	0.0379461	490						490
P14-25	159	178	6.16667	Full mutation		0.0004	4e-05	0.000307454	3.07454e-05	0	0.00425444	0.00349749	0.00600847	0.00340134	0.00508959	0.0177067			0.0258414	0.0087149	490						490
P11-26	160	179	13.4167	Full mutation		0.01	0.0004	0.00768636	0.000307454	0	-0.0158401	-0.0239155	0.0200297	0.00329246	-0.012841	0.101031	0.0190412	-0.0101991	0.0390934	0.0550264	455						455
P14-28	160	179	13.4167	Full mutation		0.01	0.0004	0.00768636	0.000307454	0	0.0143848	0.00161727	0.00591865	0.00445427					0.0255856	0.010656	455						455
P03-20	161	180	4.33333	Size-Meth Mosaic	0.71					1	0.0475821	0.0644691	0.0813934	0.0643083		0.0499811	0.0591914	0.0707869	0.242635	0.0171765	540, 1050 (156)		156				540	1050
P08-35	162	181	50.8333	Control		0.96	0.1	0.73789	0.0768636	1	0.305312	0.287359	0.329196		0.235856	0.288234	0.264691		1.1063	0.0511325	30	30
P14-31	162	181	50.8333	Control		0.96	0.1	0.73789	0.0768636	1	0.39489	0.369747	0.389599	0.403473	0.335576	0.354851	0.354405		1.44266	0.0367106	30	30
P12-17	163	182	26.1667	Control		1.27	0.21	0.976167	0.161413	1	0.357633	0.36171	0.350946	0.349284	0.355667	0.299328	0.259053	0.251013	1.25364	0.0636506	30	30
P08-37	164	183	7.08333	Control		1.3	0.1	0.999226	0.0768636	1	0.259786	0.271316	0.297161			0.273774	0.273942		1.06784	0.0235803	30	30
P14-34	164	183	7.08333	Control		1.3	0.1	0.999226	0.0768636	1	0.30665	0.354065	0.308281	0.32703	0.344338	0.310451	0.319237		1.25835	0.02731	30	30
P04-17	165	184	6.16667	Full mutation		0.06	0	0.0461181	0	0	0.0274147	0.0154849	-0.00772467	0.00812323	-0.0115482	0.015732	-0.0192335	-0.0365382	-0.00402083	0.0293058	675, 825						675	825
P07-17	165	184	6.16667	Full mutation		0.06	0	0.0461181	0	0	0.0103825	0.0301687	-0.00902205	0.0431593	0.0637671	0.0233279	0.0349488	-0.00547269	0.0927676	0.033809	675, 825						675	825
P03-18	166	185	64.8333	Control		1.77	0.09	1.36048	0.0691772	1	0.291013	0.243011	0.240761	0.227555	0.205132	0.242304	0.247713	0.261323	0.950093	0.0340564	23	23
P07-18	166	185	64.8333	Control		1.77	0.09	1.36048	0.0691772	1	0.289017	0.296686	0.277531	0.270767	0.273995		0.268865	0.272737	1.08071	0.0152464	23	23
P07-19	167	186	12.25	Full mutation		0.32	0.01	0.245963	0.00768636	0	0.0272237	0.0441135	0.0360632	0.0122696	0.015314	-0.0325524	0.00186429	0.0374364	0.0687452	0.034106	376, 620, 870						376	620	870
P03-17	168	187	6.91667	Full mutation		0.02	0.001	0.0153727	0.000768636	0	0.0505776	0.0230239	0.0244679	-0.000175535	0.04568	0.0391713	-0.0297242	-0.0539825	0.0480371	0.0515391	385, 745, 870						385	745	870
P11-23	170	189	20.8333	Full mutation		0		0		0	0.0204387	0.0200781	0.0579591	0.000388907	0.128213	0.111789	0.0276973	0.0372948	0.195886	0.0632639	340, 450, 900						340	450	900
P08-36	171	190	9.83333	Size-Meth Mosaic	0.83	0.42	0.07	0.322827	0.0538045	0	0.0330663		0.0607001		0.0504888	0.0474225	0.0942545		0.2219	0.0398401	170, 470, 670, 920 (13)		13				170	470	670	920
P10-24	172	191	9.16667	Control		1.06	0.12	0.814754	0.0922363	1	0.361572	0.334918	0.357254	0.367383	0.311755	0.211857	0.300944	0.317176	1.24308	0.0690179	30	30
P10-25	173	192	5.5	Control		1.86	0.06	1.42966	0.0461181	1	0.237239	0.259296	0.240385	0.298375	0.276512	0.244386	0.205434	0.258418	0.979794	0.0381846	30	30
P14-37	173	192	5.5	Control		1.86	0.06	1.42966	0.0461181	1	0.227168	0.261259	0.230467	0.211476	0.283064	0.272617	0.225716		0.948877	0.0401617	30	30
P10-23	174	193	5.25	Full mutation		0		0		0	-0.00475055	0.0313413	-0.0219327	-0.000502258	-0.0344205	-0.0278234	0.053181	0.043747	0.0188387	0.0463739	640						640
P11-24	175	194	70.5	Control		1.7182	0.12	1.32067	0.0922363	1	0.291429	0.319609	0.252385	0.250082	0.233034	0.239495	0.21947	0.276159	1.00968	0.0456433	37	37
P14-35	175	194	70.5	Control		1.7182	0.12	1.32067	0.0922363	1	0.0892603	0.100943	0.11822	0.0825997	0.145728		0.106423		0.415949	0.0359328	37	37
P08-38	176	195	54.8333	Control		1.86	0.12	1.42966	0.0922363	1	0.197347	0.248089	0.198186		0.210979		0.28511		0.88448	0.0659841	23	23
P14-36	176	195	54.8333	Control		1.86	0.12	1.42966	0.0922363	1	0.204237	0.148711	0.156622	0.173346	0.190927		0.193962		0.690564	0.0350432	23	23
P03-15	177	196	78.75	Control		1.57	0.05	1.20676	0.0384318	1	0.223432	0.194172	0.219488	0.184863	0.265226	0.176879	0.219344	0.219483	0.82596	0.0381443	30	30
P01-08	178	197	10.1667	Size-Meth Mosaic	0.9	0.84	0.09	0.645654	0.0691772	0	0.0252762	0.0242034	0.0438476	0.0310881	0.06288	0.088792	0.0762427	0.0500221	0.195155	0.032921	465, 550, 750, 850, 1055, 1360 (95)		95				465	550	750	850	1055	1360
P01-09	179	198	66.25	Control		1.5	0.09	1.15295	0.0691772	1	0.221234	0.219289	0.198712	0.159214	0.165229	0.178462	0.134722	0.179817	0.706541	0.0410321	30	30
P10-26	180	199	65.75	Control		1.17	0.14	0.899304	0.107609	1	0.196903	0.215336	0.184916	0.183149	0.241068	0.249138	0.201019	0.1838	0.802893	0.0356926	30	30
P10-05	181	200	58.3333	Control		1.33	0.0199	1.02229	0.0152958	1	0.193337	0.14432	0.145863	0.214568	0.167734	0.15071	0.170045	0.20036	0.672714	0.0365967	32	32
P08-01	182	201	6.58333	Size-Meth Mosaic	0.9	0.43	0.01	0.330513	0.00768636	0	0.061599	0.0256398	0.0246544		0.0782086	0.0478232	0.0678005	0.0822054	0.21504	0.0344956	310, 660 (84)		84				310	660
P09-25	183	202	7.41667	Full mutation		0		0		0	0.00141326	0.0197984	-0.00383167	0.0522798	-0.0304736	0.0417279	0.0755302	0.0459713	0.0981787	0.0478291	440						440
P04-19	184	203	79.5833	Control		1.63	0.08	1.25288	0.0614908	1		0.143415	0.130734	0.120862	0.138921	0.0845253	0.100667	0.159599	0.487099	0.0379071	46	46
P04-20	185	204	72.1667	Control		1.33	0.23	1.02229	0.176786	1	0.201257	0.182911	0.159249	0.210638	0.117394	0.18243	0.169145	0.176053	0.678602	0.039076	29	29
P05-18	186	205	68.0833	Control		1.34	0.22	1.02997	0.1691	1	0.190748	0.251162	0.229707	0.24304	0.184268	0.130564	0.134466	0.217815	0.767214	0.0636699	22	22
P05-17	187	206	40.5	Size-Meth Mosaic	0.28	4.62	0.12	3.5511	0.0922363	0	0.0163371	0.0264179	0.00890581	0.0255656	-0.0109488	0.0447264	0.0148101	0.0448407	0.0827736	0.0254431	425, 545, 780 (30-500)				30	500	425	545	780
P06-27	187	206	40.5	Size-Meth Mosaic	0.28	4.62	0.12	3.5511	0.0922363	0	0.0329447	0.0327536	0.0309108	-0.00414571	-0.00336442	-0.0450465	0.0316742	0.0556877	0.0637406	0.0437439	425, 545, 780 (30-500)				30	500	425	545	780
P09-26	188	207	16	Control						1	0.234831	0.270655	0.292695	0.269609	0.228069	0.224984	0.262093	0.359427	1.03912	0.0603764	30	30
P02-18	189	209	2.66667	Meth Mosaic	0.95	0.33	0.02	0.25365	0.0153727	0	0.0185411	0.0203528	0.022127	0.00739565	0.0417097	0.00319898	0.0107354	0.0229237	0.0712925	0.0163351	205, 220, 300, 550 (300)		300				205	220	300	550
P04-22	189	208	2.25	Meth Mosaic	0.95	0.14	0.005	0.107609	0.00384318	0	-0.000338558	0.0327506	0.0137895	0.00533286	0.0293238	-0.0090917	0.0681519	0.0168396	0.0760332	0.0331631	205, 220, 300, 550 (300)		300				205	220	300	550
P06-26	190	210	7.66667	Control		1.51	0.19	1.16064	0.146041	1	0.372317	0.45602	0.425429	0.399364	0.337827	0.350963	0.378107	0.400507	1.51357	0.0531631	24	24
P04-23	192	212	25.9167	Control		1.83	0.27	1.4066	0.207532	1	0.279901	0.256782	0.287524	0.25719	0.175486	0.203415	0.183358	0.152014	0.870963	0.0713717	30	30
P12-18	193	213	21.75	Control		1.43	0.001	1.09915	0.000768636	1	0.233955	0.257619	0.199032	0.220292	0.223527	0.172773	0.146953	0.277143	0.839739	0.0586431	31	31
P11-19	194	214	19.25	Control		1.67	0.16	1.28362	0.122982	1	0.233007	0.232235	0.210886	0.265281	0.224334	0.239246	0.241111	0.225	0.90755	0.0218106	19	19
P09-23	195	215	13.0833	Control		1.05	0.12	0.807067	0.0922363	1		0.281362	0.269491	0.242274		0.216492	0.272993	0.264928	1.00082	0.0382876	19	19
P01-10	196	216	50.4167	Control		1.25	0.14	0.960794	0.107609	1	0.129739	0.215416	0.197952	0.123827	0.12447	0.283345	0.189389	0.135785	0.679012	0.0784055	21	21
P03-12	197	217	33.8333	Full mutation		0.06	0	0.0461181	0	0	-0.00145161	0.00634611	-0.0244429	-0.0043625	0.0125943	-0.0273659	0.061661	-0.0183558	0.00224222	0.0391571	200, 345, 650, 860						200	345	650	860
P09-22	197	218	33.9167	Full mutation		0.06	1e-05	0.0461181	7.68636e-06	0	-0.0235408	0.0212335	0.00520099	-0.0186293	0.0696682	0.053897	0.0504744	0.0166452	0.0848566	0.0467723	200, 345, 650, 860						200	345	650	860
P06-24	198	219	6.41667	Deletion		0		0		0	0.0303917	0.0861121	0.0297466	0.0221139	0.0221886	0.0157184	-0.0417247	-0.00697971	0.0764256	0.0495686	FMR1 gene deleted																deletion
P09-21	199	220	25.1667	Meth Mosaic		0.3	0.01	0.230591	0.00768636	0	0.0166479	0.0139123	0.0272044	0.0129849	0.100618	-0.0129595	0.0513096	0.0577824	0.129747	0.04836	495, 550, 750, 870, 990 (very light UM smear)						495	550	750	870	990						very light Unmeth smear
P09-20	200	221	6.66667	Meth Mosaic		1.32	0.08	1.0146	0.0614908	0	-0.0174448		0.0364588	0.0213337	0.0648469	0.0134403	0.0347745	0.0501465	0.112836	0.0391665	360 light unmethylated long smear						360										light unmethylated long smear
P11-21	201	222	4.41667	Full mutation		0		0		0	-0.0179862	-0.00554535	0.0113353	0.0110505	-0.0116013	-0.00102767	0.0358156	-0.0135914	0.00409831	0.0243158	680						680
P03-11	202	223	17	Control		1.84	0.03	1.41429	0.0230591	1	0.233521	0.237625	0.236151	0.204054	0.196104	0.192875	0.209065	0.182492	0.820625	0.0296143	23	23
P05-20	203	224	7.83333	Control		1.78	0.16	1.36817	0.122982	1	0.231424	0.213972	0.199078	0.211053	0.127431	0.21599	0.218232	0.147898	0.759118	0.0511275	30	30
P12-32	204	225	21.9167	Control		1.3	0.05	0.999226	0.0384318	1	0.209655	0.195291	0.225052	0.18467	0.213462	0.189906	0.130254	0.136187	0.720024	0.0478885	27	27
P09-18	205	226	4.75	Full mutation		0.05	0.01	0.0384318	0.00768636	0	0.0343249	-0.00395425	-0.0322629	0.0141388		-0.00979679	0.0245911	0.0463141	0.0406626	0.0402166	250, 340, 430, 510, 610, 730, 870, 1050						250	340	430	510	610	730	870	1050
P06-23	206	227	8.25	Size-Meth Mosaic	0.84	0.24	0.0001	0.184473	7.68636e-05	0	0.0503086	0.0819868	0.00998189	0.000470991	0.140387	-0.0192581	0.00918958	0.0616764	0.162362	0.0720616	510 (138)		138				510
P06-22	207	228	42	Control		1.63	0.05	1.25288	0.0384318	1	0.316147	0.310463	0.344747	0.280696	0.302719	0.209253	0.248849	0.248981	1.09708	0.0609599	28	28
P12-19	208	229	1	Control						1	0.361781	0.350235	0.325364	0.320023	0.276043	0.371982	0.333039	0.313335	1.28622	0.0417529	30	30
P06-21	209	230	12.25	Full mutation		0.03	0.0001	0.0230591	7.68636e-05	0	-0.0303649	-0.00205477	-0.0171043	0.0236478	0.0592632	0.0369051	0.036511	-0.0835424	0.0112823	0.0632874	550, 640						550	640
P08-06	210	232	41.9167	Control		1.1	0.0249	0.845499	0.019139	1	0.14862	0.171552	0.151325	0.193904	0.16189	0.119478	0.129449	0.155178	0.597271	0.0319414	30	30
P10-30	210	231	40.3333	Control		1.14	0.06	0.876245	0.0461181	1	0.409461	0.265573	0.287704	0.246293					1.17285	0.142492	30	30
P10-29	211	233	41.4167	Control		1.41	0.05	1.08378	0.0384318	1	0.265665	0.24279	0.246095	0.235394	0.234606	0.241017	0.261973	0.244603	0.956559	0.01572	20	20
P09-17	212	234	33.25	Control		1.39	0.05	1.0684	0.0384318	1		0.247805	0.235249	0.257415	0.399921	0.166206	0.211652	0.24798	0.979066	0.10578	29	29
P12-21	213	235	13.3333	Control		1.53	0.02	1.17601	0.0153727	1	0.226073	0.250323	0.265324	0.250652	0.212525	0.219375	0.1202	0.15964	0.826554	0.0680422	33	33
P12-20	214	236	26.3333	Full mutation		0.11	0.0001	0.0845499	7.68636e-05	0	0.024856	0.0109247	0.0222308	0.00325069	-0.0400059	0.017774	-0.0138546	-0.00167538	0.0113985	0.0297149	390, 640						390	640
P11-14	215	237	1.33333	Size-Meth Mosaic	0.95	0.2	0.11	0.153727	0.0845499	0	0.0286225	0.0231772	-0.00256609	0.00186289	0.0748797	0.0341213	-0.0545447	-0.00817941	0.0472296	0.0518383	450, 500, 750 (190)		190				450	500	750
P04-25	216	238	41.1667	Control		1.44	0.02	1.10684	0.0153727	1	0.255798	0.222635	0.251523	0.208811	0.20112	0.192153	0.173894	0.206222	0.830456	0.0386943	43	43
P11-15	217	239	29.5833	Control		1.52	0.08	1.16833	0.0614908	1	0.260634	0.302542	0.291629	0.22287	0.26499	0.236866	0.221265	0.257782	0.998483	0.0408196	40	40
P02-22	218	240	5.41667	Full mutation		0		0		0	0.0136526	0.0131544	-0.00269645	0.0158796	-0.000139838	0.00440139	-0.0116769	-0.0379581	-0.00261108	0.0243861	590, 670, 790, 915						590	670	790	915
P02-21	219	241	5.25	Full mutation		0		0		0	0.0132	-0.00181929	-0.0229781	0.0185674	0.0579634	-0.0519638	-0.010203	0.0388602	0.0201904	0.0478278	360, 585, 680, 790						360	585	680	790
P05-01	220	242	3.5	Control		0.61	0.03	0.468868	0.0230591	1	0.241636	0.201177		0.223474	0.139743	0.183869	0.183997	0.195565	0.759129	0.0475977	24	24
P05-07	221	243	54.6667	Control		1.12	0.08	0.860872	0.0614908	1	0.247135	0.205143	0.220572	0.141031	0.229991	0.241385	0.260149		0.856659	0.0579218	20	20
P08-11	222	245	70.3333	Control		1.25	0.02	0.960794	0.0153727	1	0.180097	0.14272	0.152523	0.165635	0.188802	0.175781	0.0932118	0.201802	0.630823	0.0464476	30	30
P09-14	222	244	68.5	Control		0.94	0.07	0.722517	0.0538045	1	0.28031	0.298052	0.267248	0.234409	0.418011	0.177297	0.310341	0.347153	1.1315	0.0990846	30	30
P12-05	223	246	1.41667	Full mutation		0		0		0	0.00958299	0.0114474	0.0394096	0.00867405	0.00332822	0.0530307	0.0241619	0.0265186	0.0854406	0.0236645	280, 730, 890						280	730	890
P03-33	224	247	43.8333	Control						1	0.302783	0.255946	0.282205	0.253567	0.2936	0.285228	0.267913	0.270306	1.07268	0.0240565	20	20
P09-38	225	248	47.5833	Control		1.27	0.05	0.976167	0.0384318	1	0.236859	0.19666	0.247435	0.2931	0.232502	0.22168	0.265023	0.270986	0.952729	0.0417938	31	31
P10-02	226	249	7.25	Full mutation		0		0		0	0.00988306	0.042292	0.0234551	0.0250188	0.0286783	0.00312223	-0.0274249	0.061846	0.0809381	0.0366318	310, 440, 580, 820						310	440	580	820
P03-32	227	250	29.3333	Control		1.5	0.05	1.15295	0.0384318	1	0.268533	0.26943	0.246505	0.28979	0.313183	0.275549	0.224184	0.235092	1.02937	0.0401028	30	30
P12-06	228	251	4.5	Full mutation		0.0012502	0.00038156	0.000960948	0.000293281	0	0.0195758	0.0195053	-0.00798251	0.0149145	-0.0169651	0.0147818		0.0558393	0.0552492	0.0341599	470						470
P01-01	229	252	51.1667	Control		1.24	0.05	0.953108	0.0384318	1	0.11927	0.105051	0.0757333	0.085138	0.139333	0.146741	0.210034	0.0772559	0.464933	0.0622676	29	29
P05-08	229	253	53.75	Control		0.98	0.08	0.753263	0.0614908	1	0.176186	0.17332	0.113841		0.0702814	0.117116	0.168629	0.131984	0.527362	0.0576007	29	29
P08-02	230	254	24.5	Control		0.91	0.04	0.699458	0.0307454	1	0.254217	0.222331	0.249178	0.202463	0.227636	0.184382	0.247412	0.241545	0.887209	0.0339219	30	30
P08-03	231	255	25.5	Meth Mosaic		0		0		0	-0.0176991	-0.00911439	0.0352809	-0.0101164	0.0808122	0.0416033	0.035687	0.078716	0.114066	0.0532884	390, 450, 535 (smear pcr)						390	450	535								smear PCR
P12-01	232	256	65.5	Control		1.57	0.01	1.20676	0.00768636	1	0.252524	0.285924	0.311338	0.275744	0.3339	0.251537	0.26077	0.269819	1.08723	0.0400936	29	29
P12-07	232	257	68.3333	Control		1.36	0.04	1.04534	0.0307454	1	0.306293	0.291619	0.31271	0.292522	0.293899	0.264858		0.308618	1.14774	0.0235693	29	29
P04-08	233	259	69.9167	Control		1.04	0.01	0.799381	0.00768636	1	0.278022	0.286706	0.254579	0.290678	0.238273	0.263026	0.236173	0.214159	0.999957	0.0370902	32	32
P13-09	233	258	67.4167	Control		1.58	0.04	1.21444	0.0307454	1	0.233203	0.25344	0.296159	0.243169	0.209661	0.207871	0.249075	0.237783	0.936293	0.0381644	32	32
P12-33	234	260	6.58333	Size-Meth Mosaic	0.25	0.53	0.02	0.407377	0.0153727	0	0.0434993	0.011924	0.0425337	0.0284084	0.0132232	0.0200891	-0.00274612	-0.0165463	0.0680918	0.0286213	350, 490 (150-600)				150	600	350	490
P11-32	235	262	47.1667	Control		1.55	0.06	1.19139	0.0461181	1	0.363047	0.302257	0.306048	0.321509	0.300091	0.330597	0.339679	0.351012	1.268	0.0321931	30	30
P12-27	235	261	45.0833	Control		1.48	0.03	1.13758	0.0230591	1	0.351174	0.304549	0.331464	0.348002	0.34366	0.336175		0.341507	1.30629	0.0229572	30	30
P10-01	236	263	54.3333	Control		1.49	0.04	1.14527	0.0307454	1	0.27001	0.279944	0.279664	0.219558	0.21573	0.241119	0.167054	0.190309	0.903809	0.0578967	30	30
P03-31	237	264	49.9167	Control		1.6	0.0796	1.22982	0.0611834	1	0.274132	0.237507	0.264641	0.21767	0.309746	0.275139	0.242023	0.243096	1.00109	0.0394885	29	29
P12-28	238	265	26.25	Full mutation		0.08	0.001	0.0614908	0.000768636	0	0.0121389	0.0184628	0.0364848	0.0358486	0.021969	0.050069	0.0343908	0.0136665	0.108178	0.0183011	270, 580, 720, 850, 950						270	580	720	850	950
P08-18	239	266	7.66667	Full mutation		0.004	0.003	0.00307454	0.00230591	0	0.0057691	0.00309424	0.0113723	0.0154522	0.0109915	0.0568441	0.0205491	0.0244209	0.0720246	0.0233358	580, 880						580	880
P13-04	240	267	22.25	Size-Meth Mosaic	0.8	0.65	0.0245	0.499613	0.0188316	0	-0.00657073	0.01531	-0.0121839	0.0182552	0.0510474	-0.00395521	0.0862566	-0.047022	0.0490552	0.0562149	310, 420, 510, 800 (30-250)				30	250	310	420	510	800
P12-02	241	268	2.16667	Size-Meth Mosaic	0.72	1.93	0.02	1.48347	0.0153727	0	0.0297423	0.0286798	-0.000375345	-0.0232205	0.0180404	0.051435	0.0630768	0.0341079	0.097728	0.0376954	410, 600, 820-1000 (142, 296 light smear)		142	296			410	600							820	1000	light smear
P10-04	242	269	1.91667	Meth mosaic	0.57	2.07	0.04	1.59108	0.0307454	1	0.0263952	0.0354983	0.0439949	0.0512273	0.0363879	0.0245665	-0.0314216	0.0032121	0.0920891	0.0364297	220 (200)		200				220
P02-02	243	270	63.4167	Control		1.2	0.04	0.922363	0.0307454	1	0.261694	0.257483	0.225282	0.235395		0.270617	0.244594	0.186142	0.931937	0.0417967	31	31
P08-05	244	271	23.4167	Full mutation		0	0	0	0	0	-0.00826038	0.00906722	-0.0186262	0.00792168	-0.0107103	0.0353466	0.0510957	-0.00753455	0.0282774	0.0334716	420						420
P09-36	245	272	2.08333	Full mutation		0		0		0	-0.0209781	0.0202587	-0.0141363	0.0167056	0.072826	0.0794433	0.0178045	0.0506407	0.107952	0.0508944	520 , 680, 860						520	680	860
P10-08	246	273	9.66667	Full mutation		0.02	0.001	0.0153727	0.000768636	0	0.0271909	0.00293515	0.0118247	0.00658553		0.0842876		0.0425513	0.113418	0.0486718	170, 400, 580, 1240,						170	400	580	1240
P08-08	247	274	12.6667	Full mutation		0		0		0	0.0453668	0.0321337	0.0141648	-0.00114948	0.00200938	0.00099956	0.0492027	0.0130833	0.0755738	0.0277068	300, 410, 590, 830, 1040						300	410	590	830	1040
P02-03	248	275	6.83333	Control						1	0.253702	0.283402	0.287119	0.306296	0.238436	0.284011	0.237914	0.217163	1.02247	0.0425444	29	29
P08-04	249	276	22.3333	Control		1.29	0.0355	0.99154	0.0272866	1	0.108139	0.157612		0.155136	0.198709	0.167051	0.161022	0.199699	0.636016	0.0453511	31	31
P02-07	250	277	1.75	Full mutation		0.05	0.001	0.0384318	0.000768636	0	0.0180094	0.0100295	0.0196442	-0.00159825	0.00163943	-0.00376857	0.00671193	-0.00352967	0.0228636	0.0128069	340, 480, 680						340	480	680
P05-05	251	279	3.08333	Full mutation		0.04	0.002	0.0307454	0.00153727	0		-0.00016225			0.00463483	0.0685084	0.0749942	0.0102492	0.122791	0.0639782	350, 460 plus light smear						350	460									light smear
P13-06	251	278	2.08333	Full mutation		0		0		0	0.013828	0.0774245	0.0131535	0.00809109	0.0560837	-0.0105622	0.0311846	0.0571461	0.119488	0.0412654	350, 460 plus light smear						350	460									light smear
P09-35	252	280	68.25	Control		0.95	0.02	0.730204	0.0153727	1	0.412712	0.384536	0.390695	0.365834	0.33644	0.329274	0.342458	0.355111	1.41488	0.0402179	30	30
P08-09	253	281	3.25	Size-Meth Mosaic	0.95	0.37	0.01	0.284395	0.00768636	0	0.0397224	0.00879238	-0.00481967	0.00555561	0.0552898	0.0453596	0.0229066	0.0522182	0.109145	0.0317346	400, 850 (30-580)				30	580	400	850
P08-12	254	282	2.83333	Size-Meth Mosaic	0.68	1.8	0.0072381	1.38354	0.00556346	0		0.0146087	0.0378844	0.0311487	0.0593374	0.0349672	0.0145222	-0.0161746	0.0977244	0.034887	180, 440 (190-300)				190	300	180	440
P08-13	255	283	3.5	Size-Meth Mosaic	0.58	1.82	0.0606	1.39892	0.0465793	1	0.0371247	0.0357329	0.0250869	0.0463221	0.0708633	0.0459087	0.00625287	0.016756	0.137773	0.0274077	180, 380, 600 (150-320)				150	320	180	380	600
P13-07	256	284	54.0833	Control		1.55	0.1	1.19139	0.0768636	1	0.29363	0.282109	0.286137	0.291077	0.32548	0.345677	0.376987	0.307037	1.21653	0.0460379	36	36
P10-09	257	285	1.91667	Full mutation		0		0		0	0.0359948	0.0165835	0.00179443	0.000959262	0.0377974	0.0290842	0.0755558	0.0220195	0.106605	0.0328126	620, 750, 940, 1070						620	750	940	1070
P08-15	258	286	10.25	Point Mutation		1.5	0.0651	1.15295	0.0500382	0	0.00467797	0.024235	0.00219445	0.02061	0.0177769	0.0157838	0.0226915	0.0259836	0.0649722	0.0121723	25	25															Point mutation
P01-02	259	287	12.1667	Full mutation		0.001	0.0002	0.000768636	0.000153727	0	0.00669347	0.0142975	0.0243253	0.0104071	0.0242559	0.0129251		0.00681339	0.0552761	0.0108859	210, 260, 460, 910						210	260	460	910
P01-03	260	288	14	Full mutation		0.005	0.0002	0.00384318	0.000153727	0	0.0193942	-0.00452283	0.0190957	-0.000313691	0.0586089	0.048235	0.0593676	-0.00126374	0.0963285	0.0370981	280, 550						280	550
P01-04	261	289	2.75	Full mutation						0	0.024624	-0.011053	-0.0259729	0.0157507	-0.00772762	0.00245398	0.0236971	0.00506815	0.0130185	0.0243988	470						470
P13-05	262	290	4.66667	Meth Mosaic	0.85	0.04	0.0005	0.0307454	0.000384318	0	0.0238749	0.0383132	0.00540397	-0.00694893	0.030137	0.0379842	-0.0149837	0.0423843	0.0757455	0.0304076	350, 430, 510, 690 (450-640)				450	640	350	430	510	690
P04-05	263	291	33.8333	Full mutation		0.03	0.001	0.0230591	0.000768636	0	0.0089564	0.027721	-0.00353836	0.0047701	-0.0336904	-0.0058232	-0.0744046	-0.0252843	-0.0491309	0.0432143	470 sample						470										sample
P03-30	264	292	32.6667	Control		1.46	0.08	1.12221	0.0614908	1	0.280164	0.238274	0.249199	0.281618	0.232358	0.260419	0.280067	0.228212	0.994474	0.030807	30	30
P08-19	265	293	4.16667	Full mutation		0.08	0.006	0.0614908	0.00461181	0	0.0204699	0.0262645	0.0237215	0.00722904		0.00770223	0.0269287	0.031719	0.0798423	0.0140502	760, 870						760	870
P11-31	266	294	23.9167	Control		0.97	0.02	0.745576	0.0153727	1	0.474147	0.55013	0.48709	0.518434	0.487948	0.426155	0.443519	0.47743	1.87459	0.0536433	37	37
P03-29	267	295	2.5	Full mutation		0.001	0.0001	0.000768636	7.68636e-05	0	-0.00830342	-0.0100031	-0.0188527	-0.0142661	0.0356298	-0.0250136	0.0426046	0.0146103	0.00795741	0.0352371	400, 585, 770						400	585	770
P05-04	268	296	3.5	Full mutation		0.04	0.005	0.0307454	0.00384318	0	0.00690429	-0.00602517	-0.0199449	0.0117793	0.0337455	0.0624016		0.0162484	0.0582647	0.0394396	270, 400, 830						270	400	830
P01-05	269	297	2.41667	Full mutation		0.004	0.0008	0.00307454	0.000614908	0	0.0185448	0.00120328	0.0211334	0.0130983	0.00425595	-0.0356214	0.0480351	0.0479324	0.0575164	0.0370218	360, 520, 660, 860						360	520	660	860
P08-21	270	298	4.66667	Size-Meth Mosaic	0.9	0.09	0.003	0.0691772	0.00230591	1	0.0478242	0.0410209	0.0404667	0.0314254	0.131205	0.0800725	0.0553205	0.018961	0.21647	0.0484862	300, 390, 660, 880 (50-130)				50	130	300	390	660	880
P10-10	271	299	3.66667	Full mutation		0		0		0	0.00104186	-0.01684	-0.00187232	0.00576871	-0.00289273	0.0383168	0.0369985	0.00687642	0.0326901	0.0266744	460, 630, 740, 920						460	630	740	920
P08-22	272	300	3.66667	Full mutation		0.006	0.006	0.00461181	0.00461181	0	0.0143073	0.0215788	0.0253196	0.0171585	0.0209885	0.00122129		0.0222889	0.0681062	0.0117965	340, 550, 860						340	550	860
P03-28	273	301	3.25	Full mutation						0	0.00515509	0.0276177	-0.0288257	-0.0033768	0.0544953	-0.00898295	-0.00865844	-0.0120068	0.0123283	0.0360008	550						550
P08-23	274	302	35.9167	Control		1.42	0.03	1.09146	0.0230591	1	0.221766	0.21991	0.168696	0.1352	0.117479	0.178933	0.127178	0.176591	0.652738	0.0545645	30	30
P05-06	275	303	3.16667	Meth Mosaic	0.62	0.19	0.007	0.146041	0.00538045	0		0.0600737	0.0259959		0.0800672	-0.0207562	0.0212458	0.132318	0.193332	0.0843939	320 (330-470)				330	470	320
P08-24	276	304	8	Size-Meth Mosaic	0.3	0.57	0.09	0.438122	0.0691772	1	0.0387157	0.0451814	0.0348558	0.0813501	0.073585	0.044404	0.00901438	0.0897097	0.202171	0.0372892	300 (100-790)				100	790	300
P03-27	277	305	7.08333	Meth Mosaic	0.58	0.51	0.07	0.392004	0.0538045	0	0.0303086	0.0503594	0.027746	-0.0072982	0.0450506	0.0273858	0.080064	0.0185997	0.132034	0.0349796	280 (200-450)				200	450	280
P11-33	278	306	2.83333	Full mutation		0.18	0.03	0.138354	0.0230591	0	0.0282339	0.000866802	0.00998324	0.00686838	0.0288239	0.0721611	0.0325483	0.0360067	0.104521	0.0308252	340, 600, 840						340	600	840
P08-25	279	307	57.8333	Size-Meth Mosaic	0.45	0.63	0.0136	0.48424	0.0104534	1	0.162408	0.107323	0.150376	0.0913337	0.0471487	0.0915939	0.113851	0.068557	0.403836	0.0530645	>200 (64)		64				200										>200
P08-26	280	308	13	Full mutation		0		0		0	0.00713778	-0.0048319	0.0040357	0.0192112	0.00827249	0.0351067	0.00448653	0.0158473	0.043297	0.016688	230, 690, 1020						230	690	1020
P10-12	281	309	40.3333	Control		1.1316	0.0416	0.869788	0.0319752	1	0.391444	0.401033	0.33762	0.410777	0.30642	0.270024	0.411059	0.359108	1.40053	0.0720709	29	29
P03-26	282	310	12.5	Control		1.1842	0.1461	0.910218	0.112298	1	0.239662	0.240279	0.266556	0.243165	0.216938	0.223647	0.233242	0.236625	0.921623	0.0202312	30	30
P04-10	283	311	12.75	Control		1.4077	0.0632	1.08201	0.0485778	1	0.294535	0.262889	0.227415	0.237286	0.171793	0.248359	0.1837	0.213034	0.891986	0.0555154	31	31
P07-03	283	311	12.75	Control		1.4077	0.0632	1.08201	0.0485778	1	0.248504	0.266169	0.283995	0.282218	0.266189	0.285101	0.269993	0.261799	1.0496	0.0174283	31	31
P04-11	284	312	12.5833	Control		1.1147	0.0433	0.856798	0.0332819	1	0.142528	0.134212	0.122013	0.177378	0.127211	0.104474	0.125487	0.0719652	0.48759	0.0414175	30	30
P07-04	284	312	12.5833	Control		1.1147	0.0433	0.856798	0.0332819	1	0.277705	0.294843	0.313397	0.266138	0.235235	0.256827	0.238201	0.229822	1.02448	0.0411444	30	30
P11-28	285	313	18.8333	Control		1.2412	0.1005	0.95403	0.0772479	1	0.256943	0.287999	0.351192	0.292059	0.284762	0.226699	0.244388	0.327699	1.10187	0.0570154	40	40
P14-07	285	313	18.8333	Control		1.2412	0.1005	0.95403	0.0772479	1	0.283825	0.259485	0.26962	0.313858	0.36888	0.323705	0.330444		1.1917	0.0564748	40	40
P11-27	286	314	37.0833	Control		1.2	0.22	0.922363	0.1691	1	0.209311	0.20705	0.21268	0.231079	0.240524	0.178764	0.150236	0.225429	0.802769	0.0404989	20	20
P14-14	286	314	37.0833	Control		1.2	0.22	0.922363	0.1691	1		0.252927	0.255978	0.240177		0.237585	0.222956		0.938736	0.0229605	20	20
P06-38	287	315	37.75	Control		0.948	0.07	0.728667	0.0538045	1	0.242089	0.225556	0.224277	0.267564	0.235277	0.232107	0.292403	0.243837	0.952179	0.0321027	30	30
P07-05	287	315	37.75	Control		0.948	0.07	0.728667	0.0538045	1	0.348029	0.266503	0.27759	0.296997	0.171055	0.233775	0.2048	0.265862	1.00141	0.0753564	30	30
P04-13	288	316	18.0833	Control		1.7	0.05	1.30668	0.0384318	1	0.272897	0.276204	0.20479	0.250958	0.20214	0.181358	0.188976	0.244877	0.883831	0.0519992	30	30
P07-09	288	316	18.0833	Control		1.7	0.05	1.30668	0.0384318	1	0.271636	0.220855	0.301273	0.274163	0.252181		0.249684	0.272227	1.02108	0.037004	30	30
P09-32	289	317	9.25	Control		1.0967	0.19	0.842963	0.146041	1	0.305828	0.297066	0.27924	0.291965	0.267157	0.267702	0.285092	0.323103	1.1239	0.0262253	30	30
P14-20	289	317	9.25	Control		1.0967	0.19	0.842963	0.146041	1	0.394336	0.41581	0.389289	0.432097	0.401722	0.41189			1.58131	0.0248629	30	30
P12-13	290	318	8.75	Control		1.4044	0.09	1.07947	0.0691772	1	0.118337	0.121926	0.118096	0.0777228	0.10642	0.149865	0.0452946	0.0712476	0.392349	0.0463142	30	30
P02-09	291	319	30.5	Control		1.48	0.04	1.13758	0.0307454	1	0.232171	0.245114	0.248009	0.255158	0.208163	0.190863	0.239688	0.185875	0.875508	0.0369831	30	30
P07-13	291	319	30.5	Control		1.48	0.04	1.13758	0.0307454	1	0.291781	0.286924	0.27514	0.288308	0.29555		0.34367	0.251285	1.12676	0.0408086	30	30
P07-20	292	320	25.4167	Control		1.11	0.1	0.853185	0.0768636	1	0.347557	0.35442	0.287412	0.292954	0.276822	0.216862	0.291352	0.209419	1.10433	0.0719663	27	27
P13-08	293	321	41.1667	Control		1.25	0.03	0.960794	0.0230591	1	0.244719	0.224926	0.242764	0.276855	0.203944	0.247418	0.158343	0.207944	0.876417	0.0493753	29	29
P11-25	294	322	10.0833	Control		1.78	0.29	1.36817	0.222904	1	0.315676	0.350422	0.32602	0.305326	0.258635	0.297095	0.306896	0.260174	1.1739	0.0427446	25	25
P14-26	294	322	10.0833	Control		1.78	0.29	1.36817	0.222904	1	0.264571	0.21703	0.242511	0.227191	0.243181	0.201634	0.239451		0.906639	0.0299496	25	25
P10-27	295	323	26.6667	Control		1.05	0.06	0.807067	0.0461181	1	0.201126	0.195278	0.184366	0.191398	0.153596	0.20983	0.218616	0.218355	0.76275	0.0292464	36	36
P14-38	295	323	26.6667	Control		1.05	0.06	0.807067	0.0461181	1	0.174606	0.183413	0.174205	0.173355	0.165392		0.174332		0.676013	0.00905419	36	36
P04-21	296	324	29.3333	Control		1.65	0.11	1.26825	0.0845499	1	0.271103	0.294357	0.25889	0.299029	0.216387	0.201162	0.190988	0.242835	0.957824	0.0564803	30	30
P12-29	297	325	5.75	Control		1.26	0.29	0.968481	0.222904	1	0.300417	0.290909	0.283448	0.259185	0.248511	0.258575	0.235153	0.256096	1.03424	0.0309565	31	31
P06-16	298	328	37	Control		1.3726	0.2168	1.05503	0.16664	1	0.426826	0.374507	0.469479	0.410022	0.33483	0.412072	0.517864	0.346592	1.59683	0.0842058	29	29
P05-25	299	326	61.3333	Control		1.3287	0.1027	1.02129	0.0789389	1		0.299799	0.342961	0.301748	0.28393	0.257707	0.261139	0.276116	1.12162	0.0429183	22	22
P04-27	300	327	18.75	Full mutation		0.0444	0.0037037	0.0341274	0.0028468	0	0.00101434	0.0159003	-0.00199466	0.00519613	0.0174524	0.0262053	-0.00334452	0.0258502	0.0418486	0.0166011	370, 445						370	445

## Sheet: Column descriptions
Column name	Description
Sample	Unique identification code samples in Randol et al., 2024
Bio.num	Number unique to each individual
Tech.num	Number unique to each blood draw from an individual
Age.days	Age of individual in days
Age.month	Age of individual in months
Age.year	Age of individual in years
Category	Type of FMR1 allele
Fraction.methylated	The fraction of cells carrying methylated alleles in an individual
mRNA	mean FMR1 mRNA, not normalized to mean of controls
mRNA.se	standard error of the mean of FMR1 mRNA, not normalized to mean of controls
mRNArel	mean FMR1 mRNA, yes normalized to mean of controls
mRNArel.se	standard error of the mean of FMR1 mRNA, yes normalized to mean of controls
FMRPsig	0 = Not signficant, 1 = Significant. See Methods section
FMRP.1	FMRP replicate #1 corrected to total protein, but not normalized to the mean of controls
FMRP.2	FMRP replicate #2 corrected to total protein, but not normalized to the mean of controls
FMRP.3	FMRP replicate #3 corrected to total protein, but not normalized to the mean of controls
FMRP.4	FMRP replicate #4 corrected to total protein, but not normalized to the mean of controls
FMRP.5	FMRP replicate #5 corrected to total protein, but not normalized to the mean of controls
FMRP.6	FMRP replicate #6 corrected to total protein, but not normalized to the mean of controls
FMRP.7	FMRP replicate #7 corrected to total protein, but not normalized to the mean of controls
FMRP.8	FMRP replicate #8 corrected to total protein, but not normalized to the mean of controls
FMRPrel	Mean FMRP, both corrected to total protein and normalized to the mean of controls
FMRPrel.se	Standard error of the mean of FMRP, both corrected to total protein and normalized to the mean of controls
Unsorted.CGG.repeats.-all.identified.alleles	Size of all FMR1 trinucleotide repeats detected. Those in parentheses are unmethylated. These same numbers are sorted in the following columns.
UnMeth.CONTROL.CGG1	Size of the FMR1 trinucleotide repeat in control individuals
UnMeth.from.Mosaic.CGG2	Size of the smallest unmethylated FMR1 repeat in FXS individuals
UnMeth.from.Mosaic.CGG3	Size of the next largest unmethylated FMR1 repeat in FXS individuals
UnmethSmear.Lo.End	Size of the smallest FMR1 repeat of an unmethylated smear (low end of the smear) in FXS individuals
UnmethSmear.Hi.End	Size of the largest FMR1 repeat of an unmethylated smear (high end of the smear) in FXS individuals
Smallest.Meth.CGG1	Size of the smallest methylated FMR1 trinucleotide repeat in FXS individuals
MethCGG2	Size of the next largest methylated FMR1 trinucleotide repeat in FXS individuals
MethCGG3	Size of the next largest methylated FMR1 trinucleotide repeat in FXS individuals
MethCGG4	Size of the next largest methylated FMR1 trinucleotide repeat in FXS individuals
MethCGG5	Size of the next largest methylated FMR1 trinucleotide repeat in FXS individuals
MethCGG6	Size of the next largest methylated FMR1 trinucleotide repeat in FXS individuals
MethCGG7	Size of the next largest methylated FMR1 trinucleotide repeat in FXS individuals
MethCGG8	Size of the next largest methylated FMR1 trinucleotide repeat in FXS individuals
MethSmearLoEnd	Size of the smallest FMR1 repeat of a methylated smear (low end of the smear) in FXS individuals
MethSmearHiEnd	Size of the largest FMR1 repeat of a methylated smear (high end of the smear) in FXS individuals
Comments	Comments from Southern blot
